# Supplementary material for: Genome sequence of Gossypium anomalum facilitates interspecific introgression breeding
Source: PubMed Central journal article supplement — Plant Commun. 2022 Jun 22;3(5):100350. doi: 10.1016/j.xplc.2022.100350 (PMC9483115; doi:10.1016/j.xplc.2022.100350), 2022-06-22
Supplement: mmc1.pdf [file mmc1.pdf]

**Supplemental information**

**Genome sequence of *Gossypium anomalum* facilitates interspecific introgression breeding**

**Zhenzhen Xu, Jiedan Chen, Shan Meng, Peng Xu, Caijiao Zhai, Fang Huang, Qi Guo, Liang Zhao, Yonggang Quan, Yixin Shangguan, Zhuang Meng, Tian Wen, Ya Zhang, Xianggui Zhang, Jun Zhao, Jianwen Xu, Jianguang Liu, Jin Gao, Wanchao Ni, Xianglong Chen, Wei Ji, Nanyi Wang, Xiaoxi Lu, Shihong Wang, Kai Wang, Tianzhen Zhang, and Xinlian Shen**

# Supporting Information

## Genome sequence of *Gossypium anomalum* facilitates interspecific introgression breeding

Zhenzhen Xu<sup>1,5</sup>, Jiedan Chen<sup>2,5</sup>, Shan Meng<sup>1,5</sup>, Peng Xu<sup>1</sup>, Caijiao Zhai<sup>1</sup>, Fang Huang<sup>1</sup>, Qi Guo<sup>1</sup>, Liang Zhao<sup>1</sup>, Yonggang Quan<sup>3</sup>, Yixin Shangguan<sup>1</sup>, Zhuang Meng<sup>4</sup>, Tian Wen<sup>3</sup>, Ya Zhang<sup>4</sup>, Xianggui Zhang<sup>1</sup>, Jun Zhao<sup>1</sup>, Jianwen Xu<sup>1</sup>, Jianguang Liu<sup>1</sup>, Jin Gao<sup>1</sup>, Wanchao Ni<sup>1</sup>, Xianglong Chen<sup>1</sup>, Wei Ji<sup>1,4</sup>, Nanyi Wang<sup>1</sup>, Xiaoxi Lu<sup>1,4</sup>, Shihong Wang<sup>3</sup>, Kai Wang<sup>4,\*</sup>, Tianzhen Zhang<sup>2,\*</sup>, Xinlian Shen<sup>1,\*</sup>

<sup>1</sup>Key Laboratory of Cotton and Rapeseed (Nanjing), Ministry of Agriculture and Rural Affairs, the Institute of Industrial Crops, Jiangsu Academy of Agricultural Sciences, Nanjing, China

<sup>2</sup>Institute of Crop Science, Plant Precision Breeding Academy, Zhejiang Provincial Key Laboratory of Crop Genetic Resources, College of Agriculture and Biotechnology, Zhejiang University, Hangzhou, China

<sup>3</sup>JOIN HOPE SEEDS Co., Ltd., Changji, China

<sup>4</sup>Key Laboratory of Genetics, Breeding and Multiple Utilization of Crops (MOE), Fujian Agriculture and Forestry University, Fuzhou, China

<sup>5</sup>These authors contributed equally to this article.

\*Correspondence: Kai Wang (kwang5@126.com), Tianzhen Zhang (cotton@zju.edu.cn), Xinlian Shen (xlshen68@126.com)

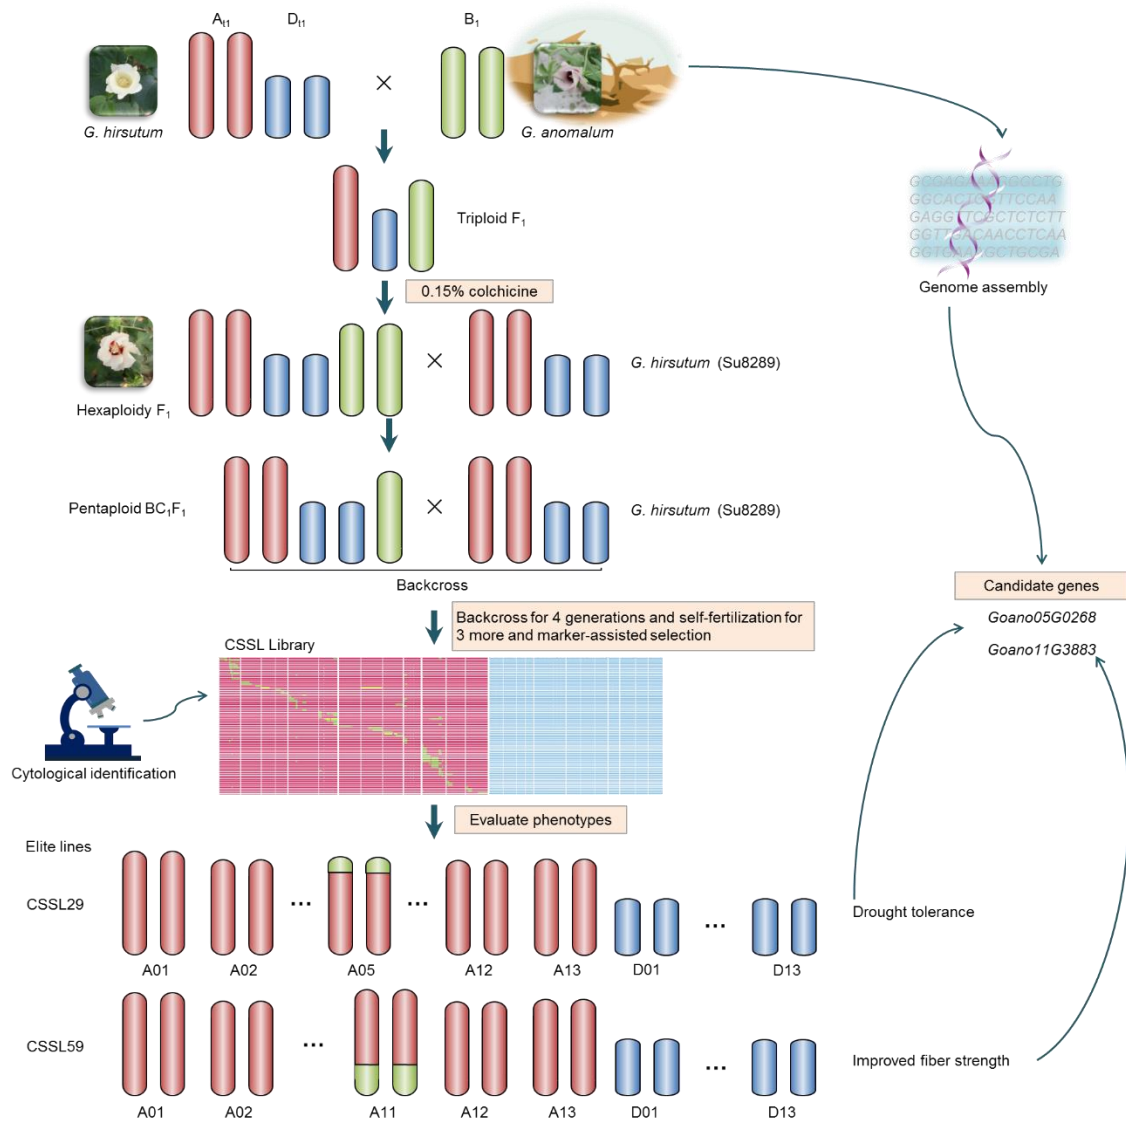

**Supplemental Figure 1.** Scheme for generating the CSSL population and rapidly discovering and cloning agronomic genes from *G. anomalum*.

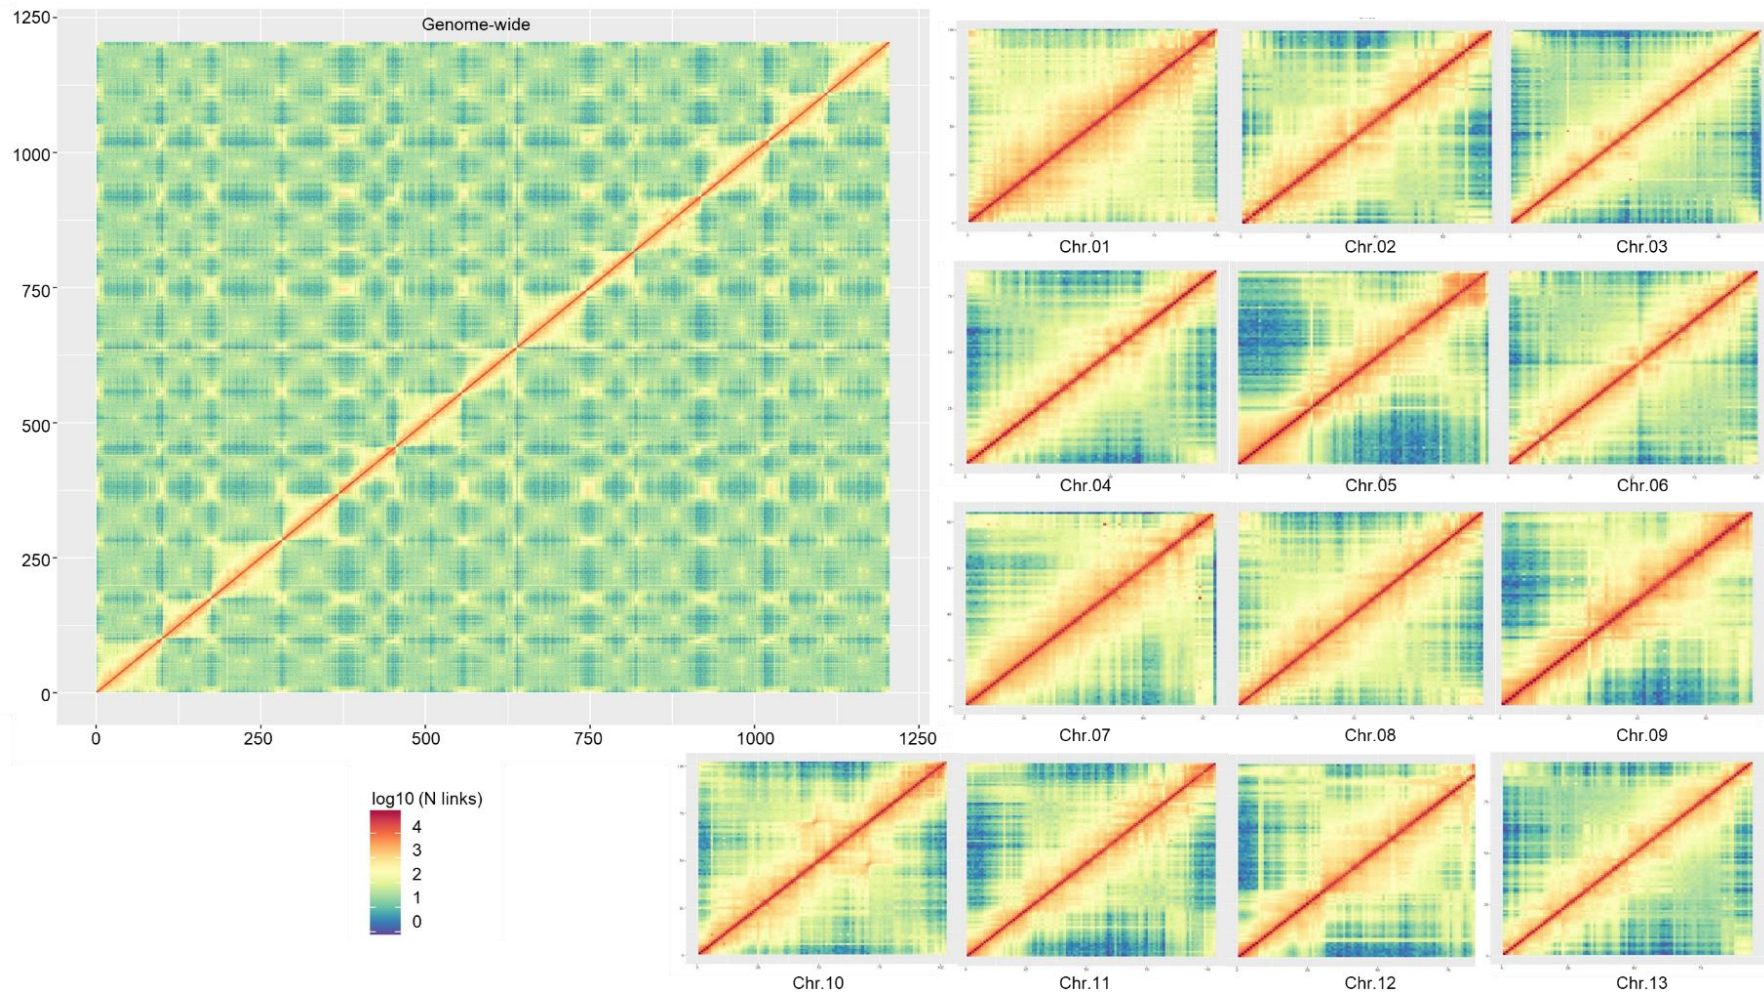

**Supplemental Figure 2.** Chromatin interaction frequency distribution of Hi-C links among chromosomes of *G. anomalum*. Strong signals (dark red dots) were distributed in diagonal lines, and this indicated that the scaffolds were accurately grouped and oriented on the pseudo-chromosomes.

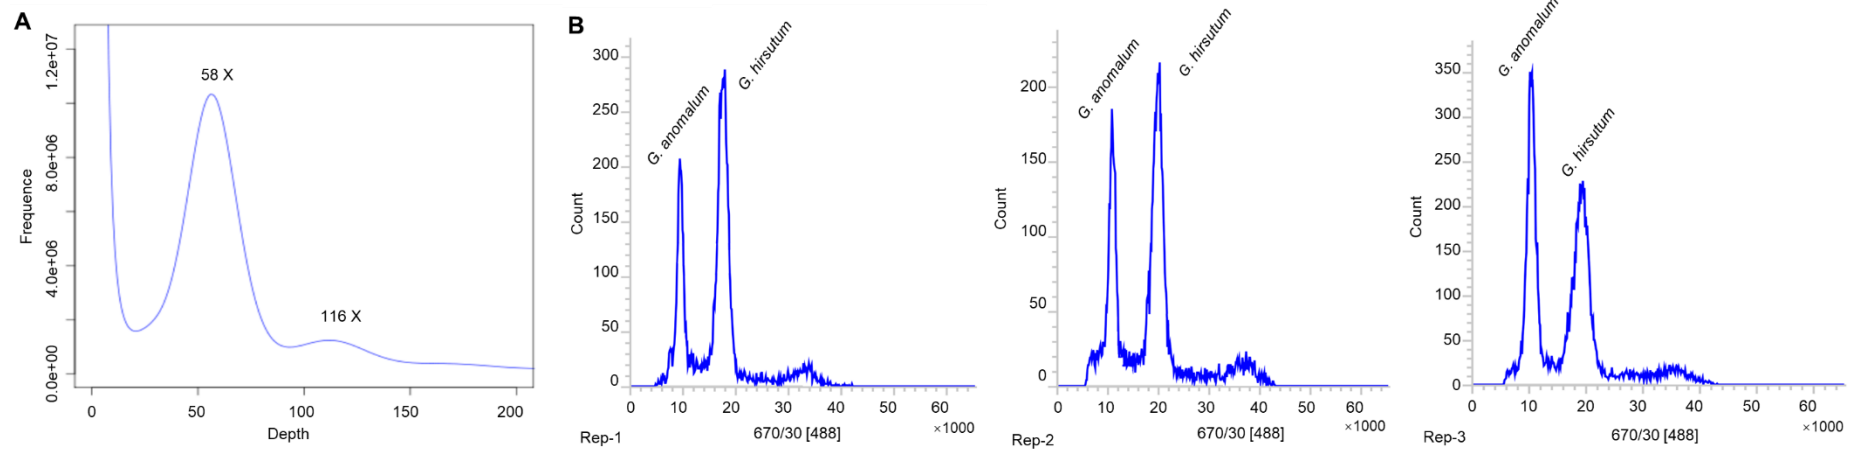

**Supplemental Figure 3.** (A) Distribution of sequencing depth and K-mer number frequency (K-mer = 17). (B) The schematic diagram of genome size determined by flow cytometry.

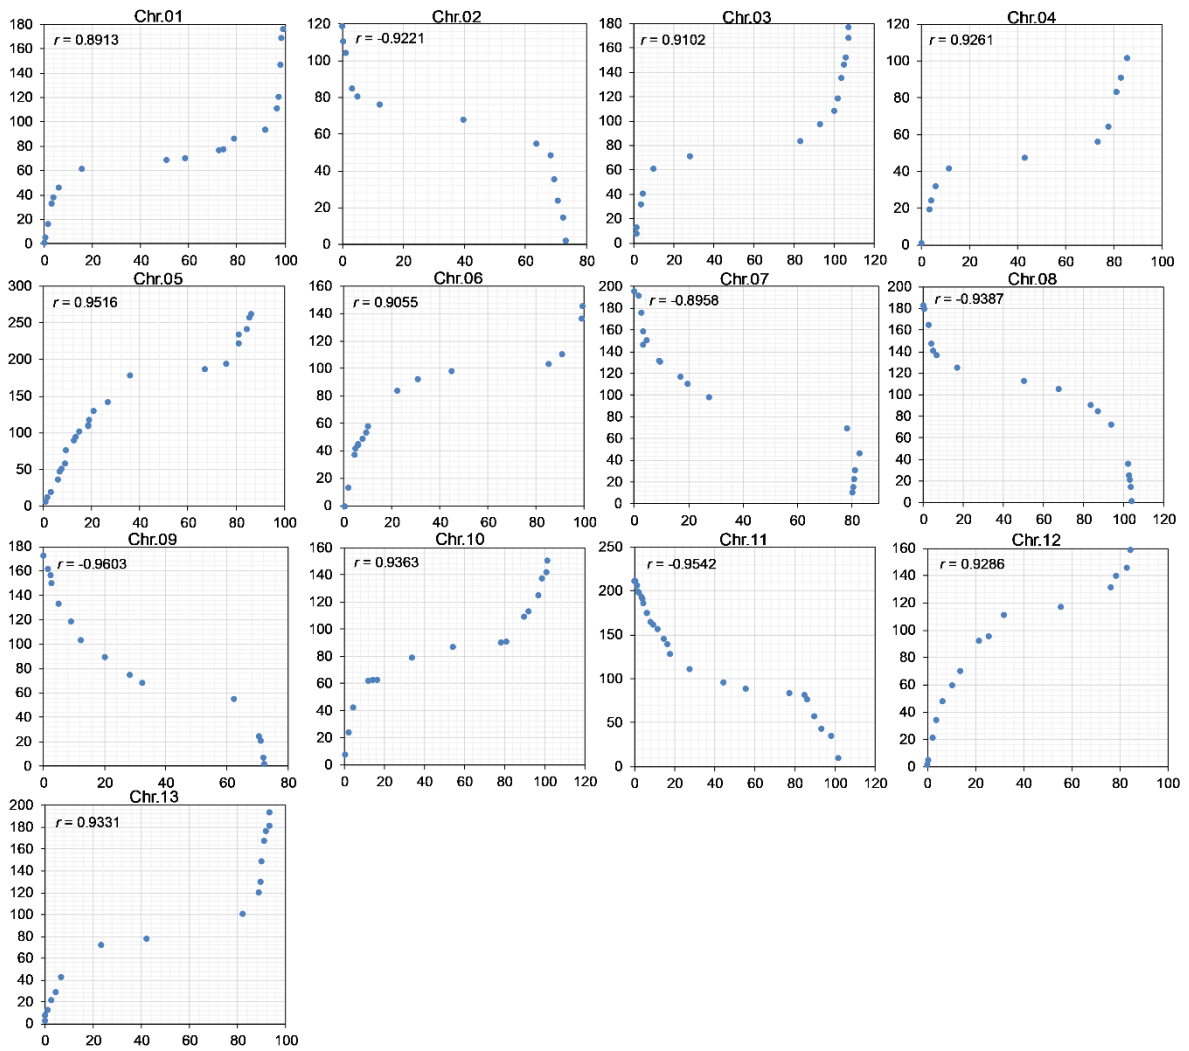

**Supplemental Figure 4.** Comparison of Hi-C directed chromosome assembly with genetic map in *G. anomalum*. The x-axes represent the physical positions in the assembled chromosomes (Mb) and the y-axes represent the genetic distance on the genetic map (cM). The  $r$  represents the correlation coefficient between the genetic and physical map distance.

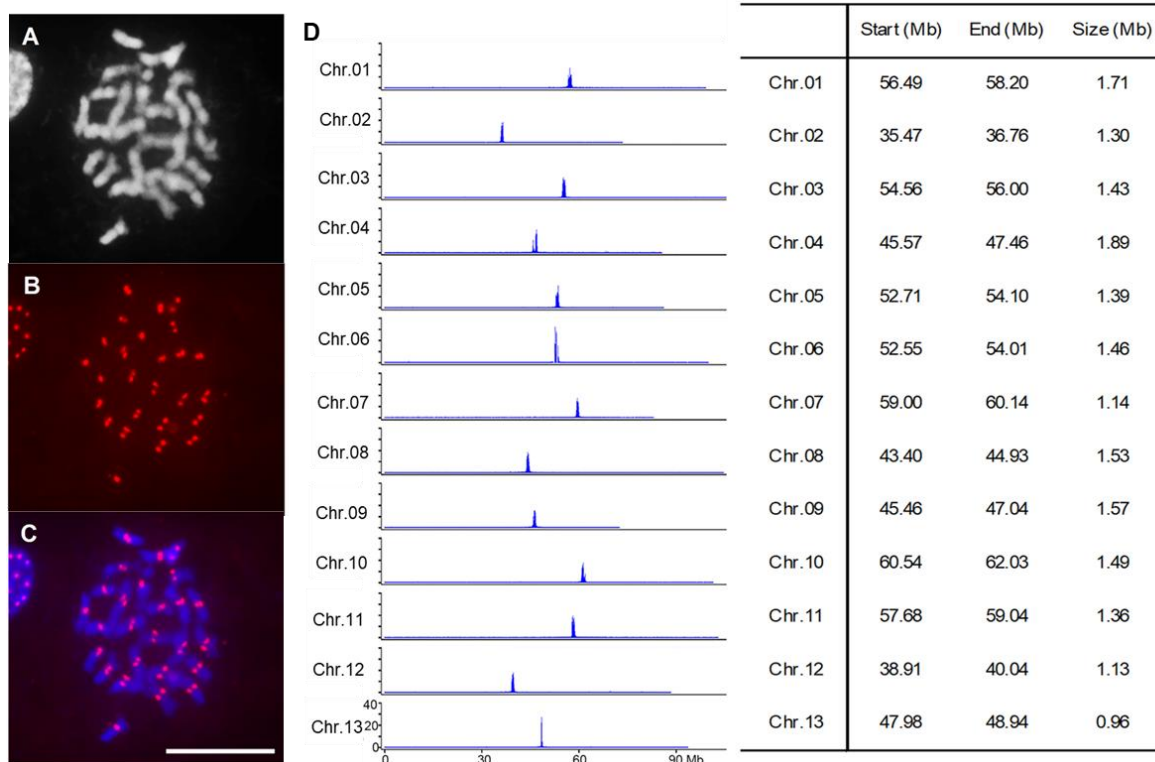

**Supplemental Figure 5.** Immunostaining using cotton anti-CenH3 antibodies in *G. anomalum*. Somatic metaphase chromosomes were stained with 4', 6-diamidino-2-phenylindole (DAPI) and showed in gray and blue in (A) and (C), respectively. Immunofluorescence signals (B) are visible at the primary constrictions of the chromosomes (C). Scale bar, 10  $\mu$ m. (D) The centromere distribution in each chromosome. Left panel, CenH3 binding region i.e. centromere on each chromosome by CenH3 ChIP-seq mapping. The x- and y-axes indicate the position on the chromosome and the read density, respectively. Read density was represented by the percentage of mapped unique reads of respective 10-kb window. Right panel, the list of the size and spanning regions of each centromere.

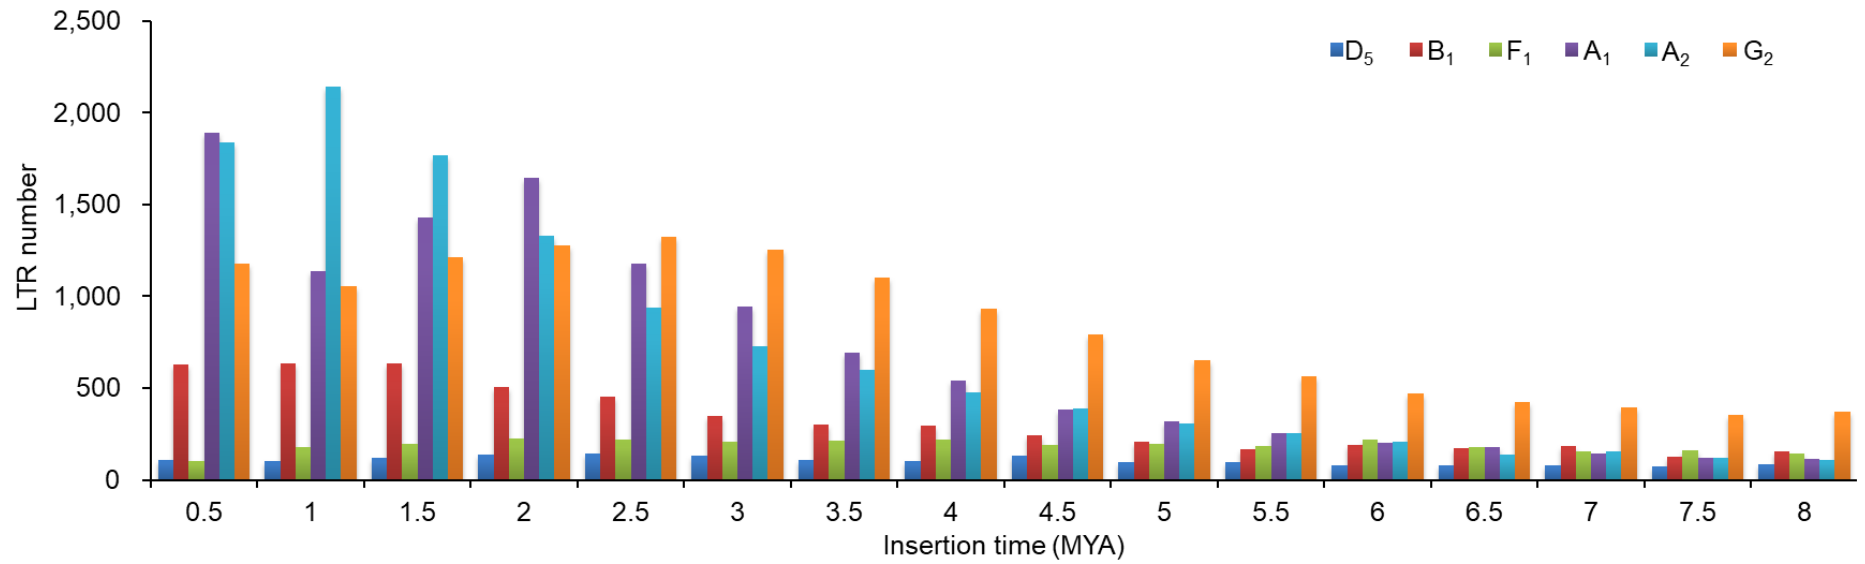

**Supplemental Figure 6.** Analysis of the LTR number and insertion time in D<sub>5</sub>, B<sub>1</sub>, F<sub>1</sub>, A<sub>1</sub>, A<sub>2</sub>, and G<sub>2</sub> genome.



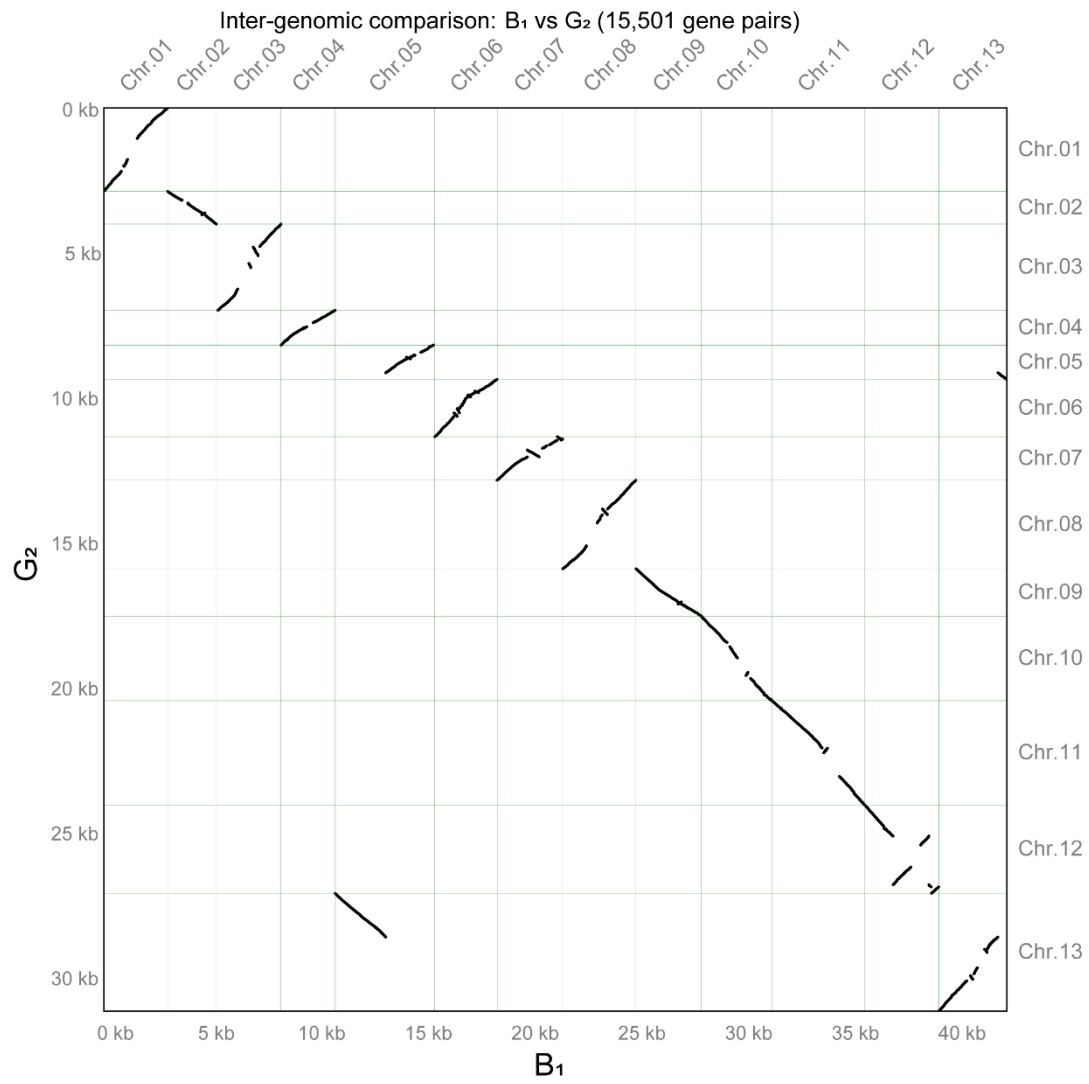

**Supplemental Figure 7.** Analysis of the synteny between *G. anomalum* and *G. austral* genome.

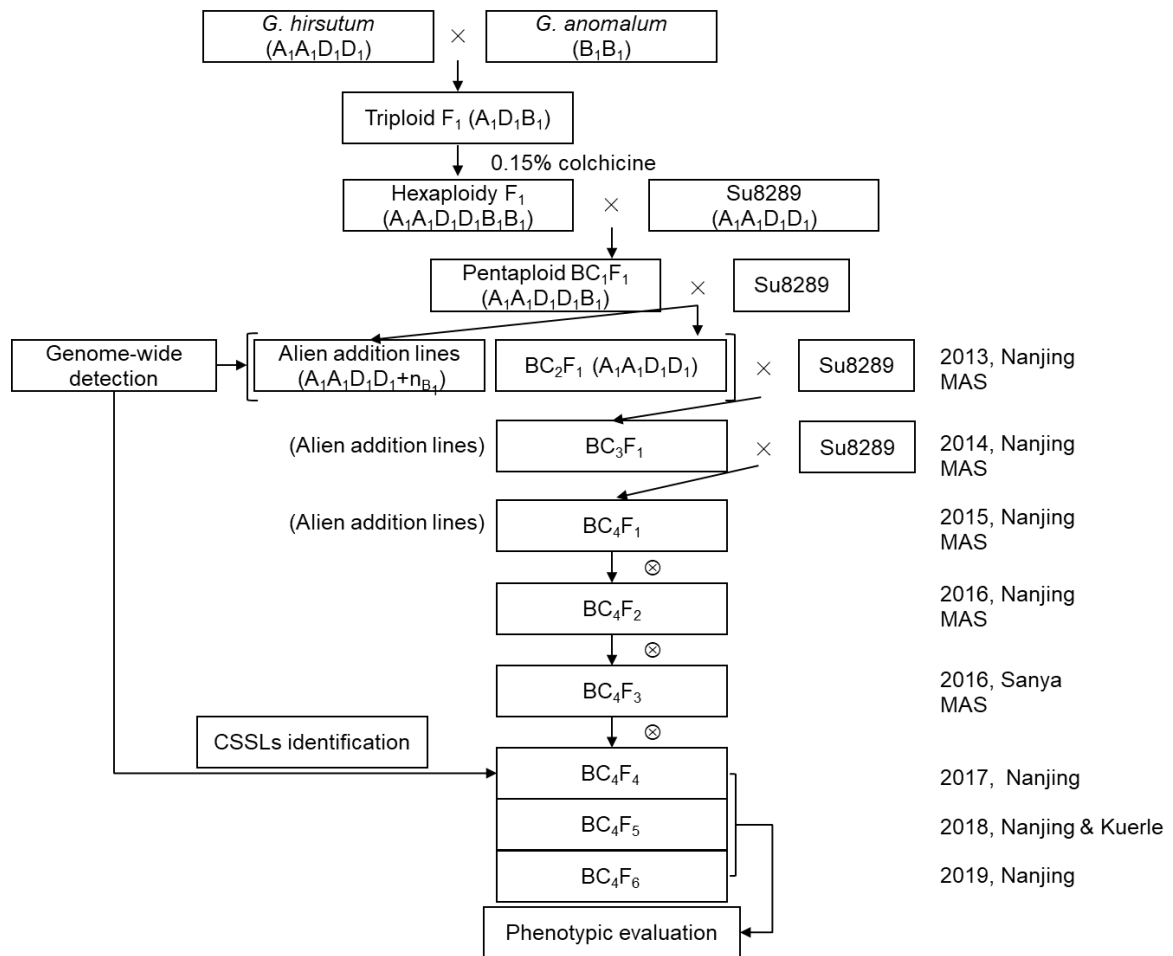

**Supplemental Figure 8.** Development of the CSSL population.

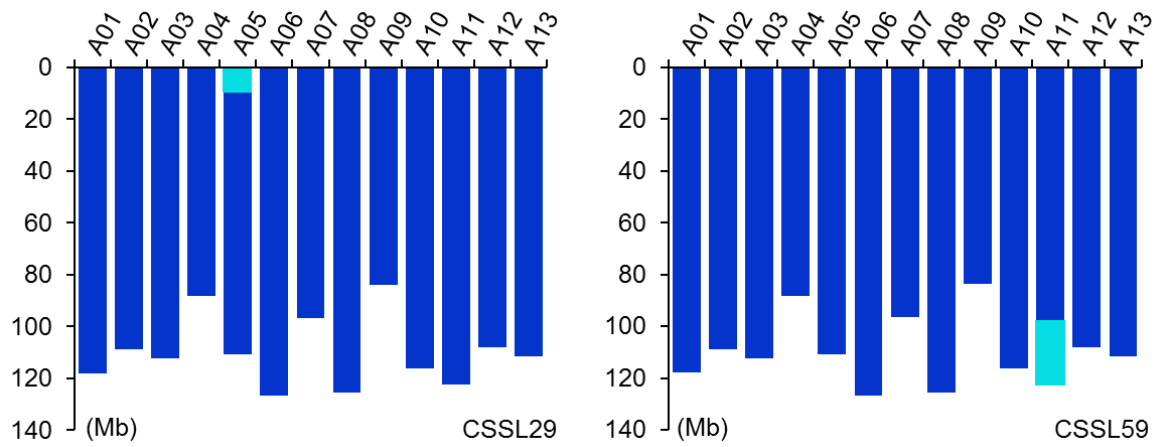

**Supplemental Figure 9.** Graphical genotype of CSSL29 and CSSL59 based on re-sequencing method. The introgression segments on A05 (from 0.02 Mb to 5.89 Mb) and A11 (from 104.49 Mb to 121.36 Mb) were shown by the light blue box, respectively.

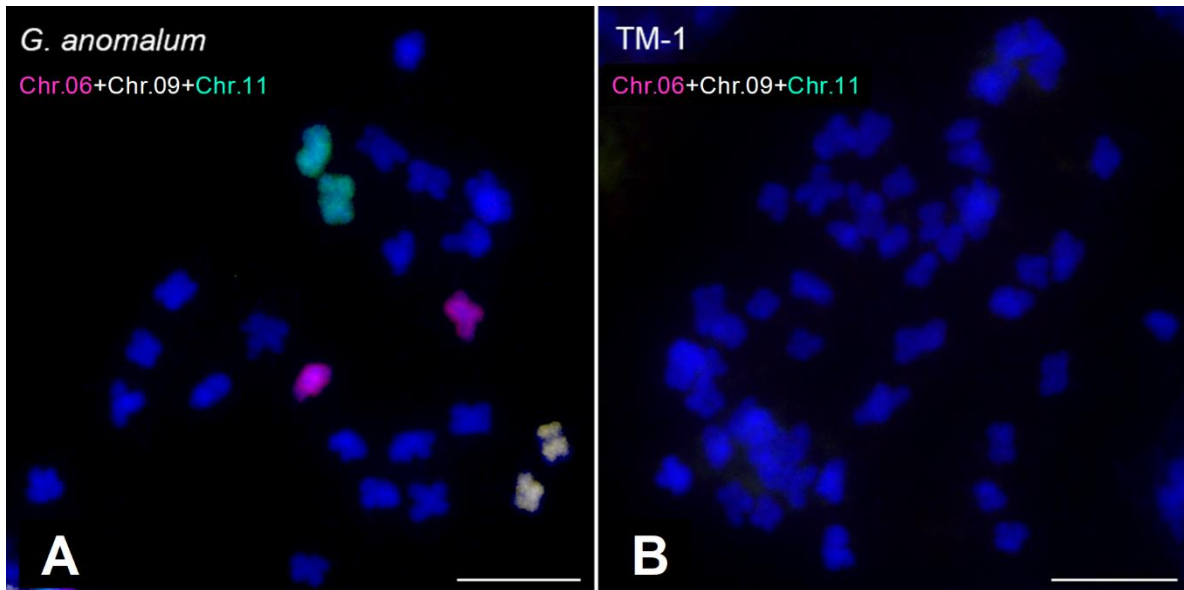

**Supplemental Figure 10.** FISH analyses using *G. anomalum*-specific oligo probes of chromosomes 6, 9, and 11. FISH image showing that *G. anomalum*-specific oligo probes of chromosomes 6, 9, and 11 were hybridized in the same mitotic metaphase cell of *G. anomalum* (A) and *G. hirsutum* TM-1 (B). The signals of the chromosomes 6, 9, and 11 probes are pseudocolored in magenta, white, and light blue, respectively. Scale bar, 10  $\mu$ m.

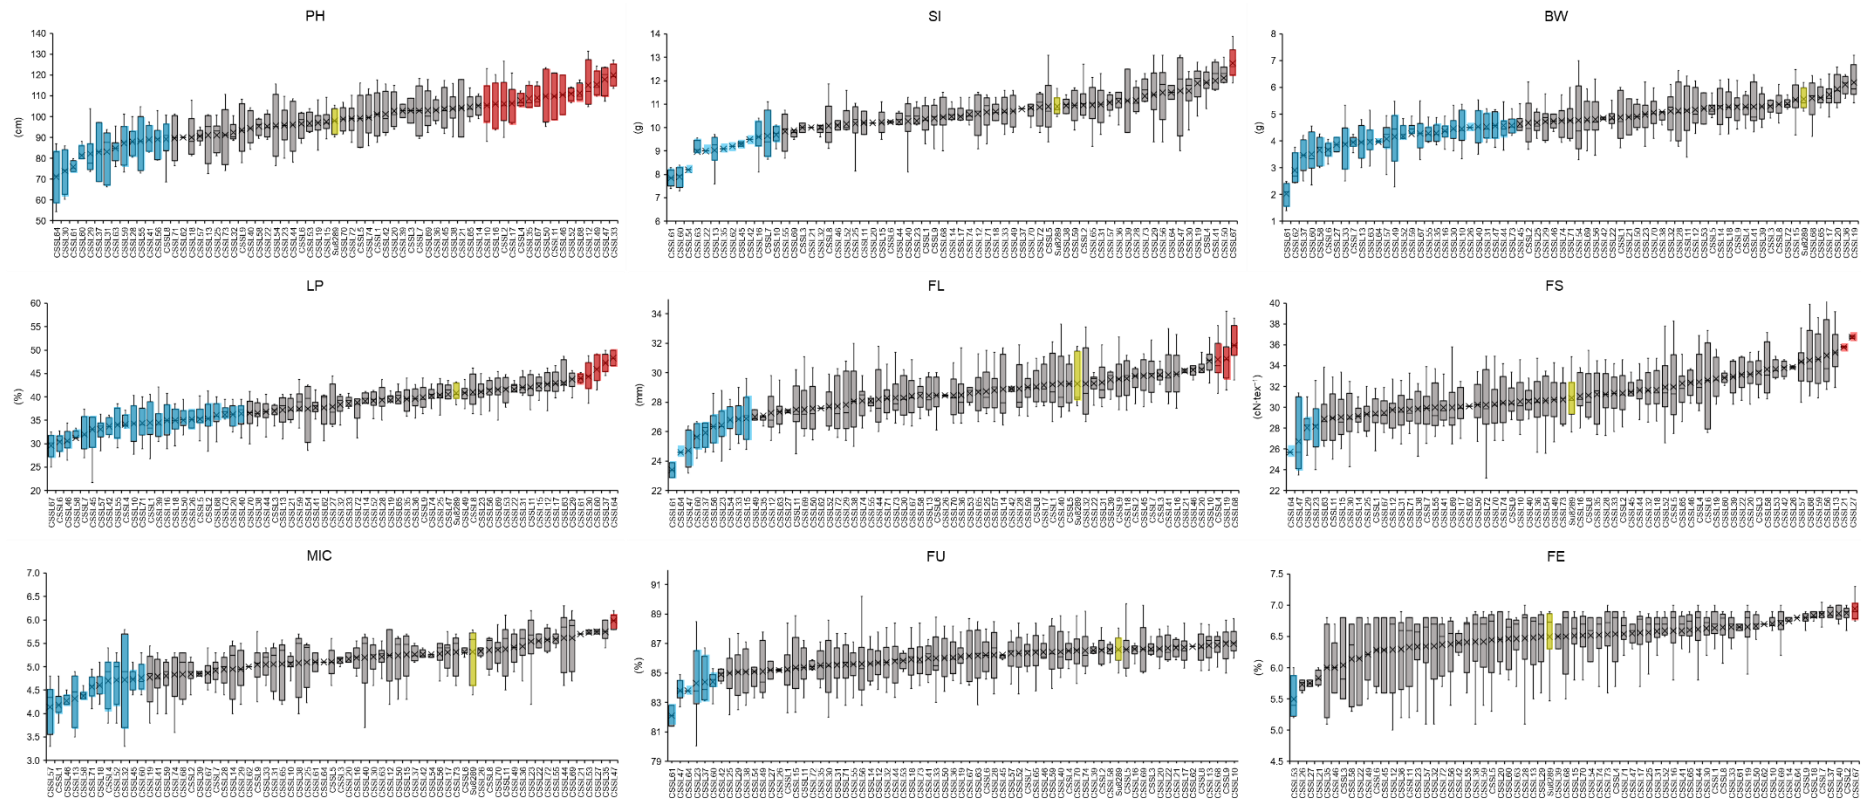

**Supplemental Figure 11.** Boxplots of phenotypic distribution of nine traits in the CSSL population. The horizontal axis indicates CSSL, and the vertical axis represents phenotypic value. The yellow graph represents the recurrent parent Su8289, the red graph indicates the CSSL with phenotypic value significantly higher ( $P < 0.05$ ) than that of Su8289, while the blue graph indicates the CSSL with phenotypic value significantly lower ( $P < 0.05$ ) than that of Su8289.

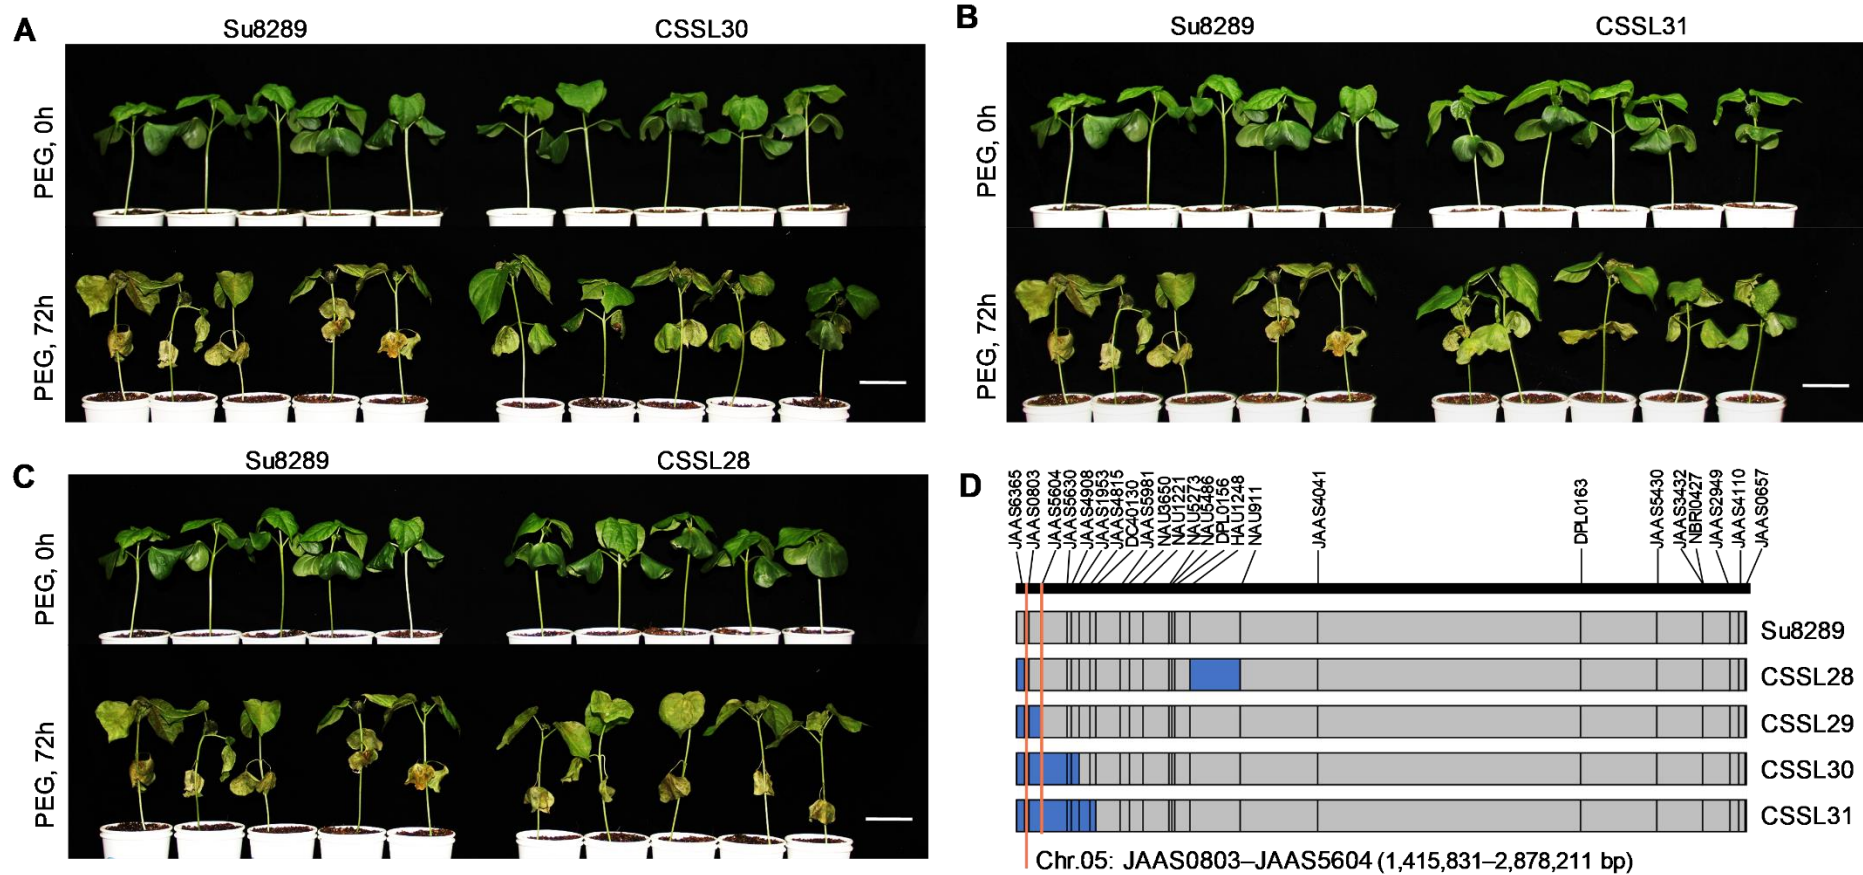

**Supplemental Figure 12.** Identification of valuable substitution segment associated with drought tolerance. (A, B, and C) Phenotypic comparison of CSSL30, CSSL31, CSSL28, and Su8289 cotton seedlings in response to drought stress in the form of PEG treatment. Photographs were taken at 0 h and 72 h after PEG treatment. Scale bars, 5 cm. (D) Graphical genotypes of SSR interval for drought stress on Chr.05.

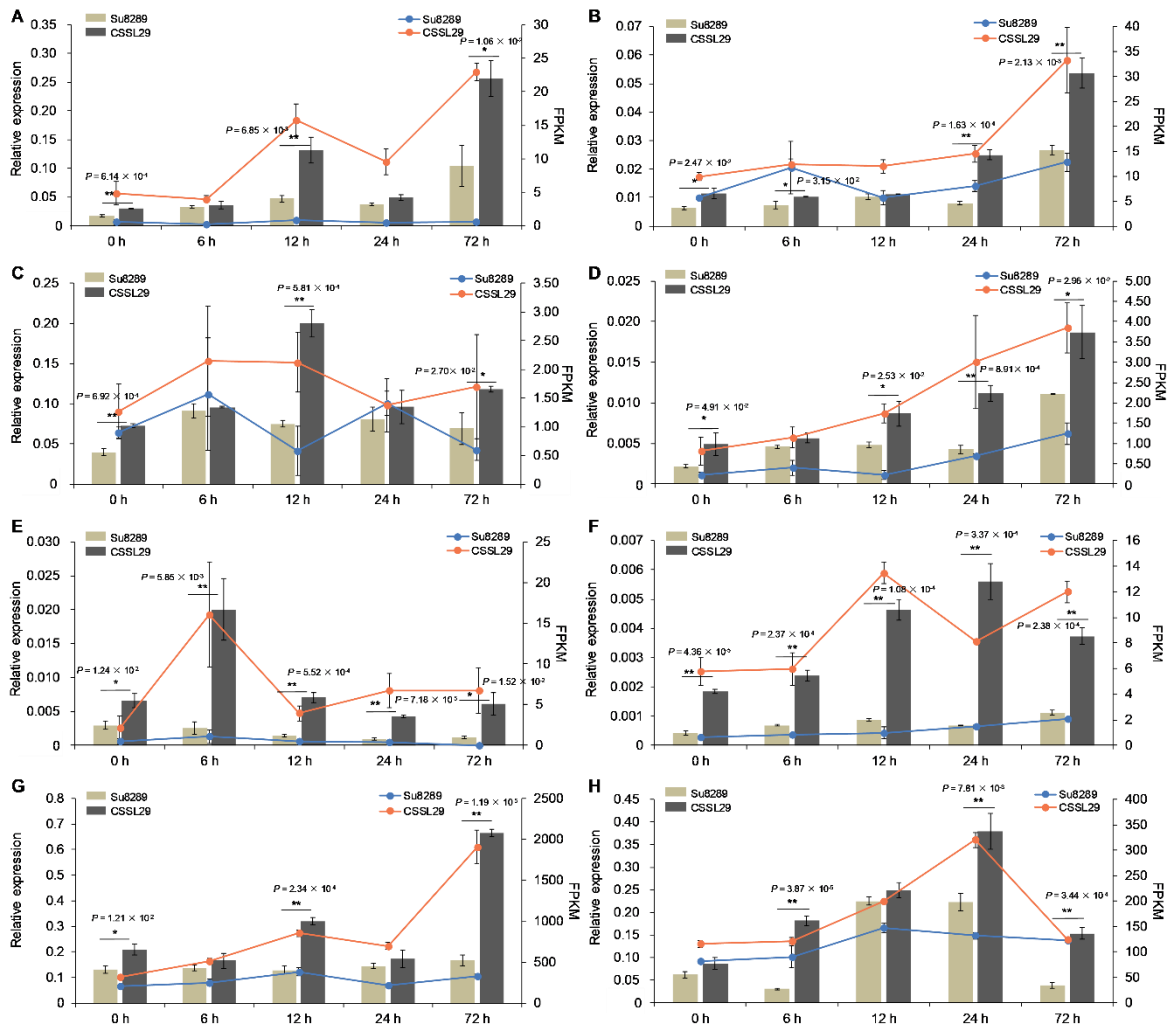

**Supplemental Figure 13.** Expression level of eight candidate genes under PEG stress in CSSL29 and Su8289. (A-H) Expression level of *Goano05G0164*, *Goano05G0170*, *Goano05G0207*, *Goano05G0222*, *Goano05G0235*, *Goano05G0236*, *Goano05G0301*, and *Goano05G0319* in CSSL29 and Su8289 under PEG stress at 0, 6, 12, 24, and 72 hours. The left y-axis shows the relative expression obtained from qRT-PCR, and the right y-axis shows the FPKM value obtained from RNA-Seq data. \* $P < 0.05$ , \*\* $P < 0.01$ , Student's *t* test.

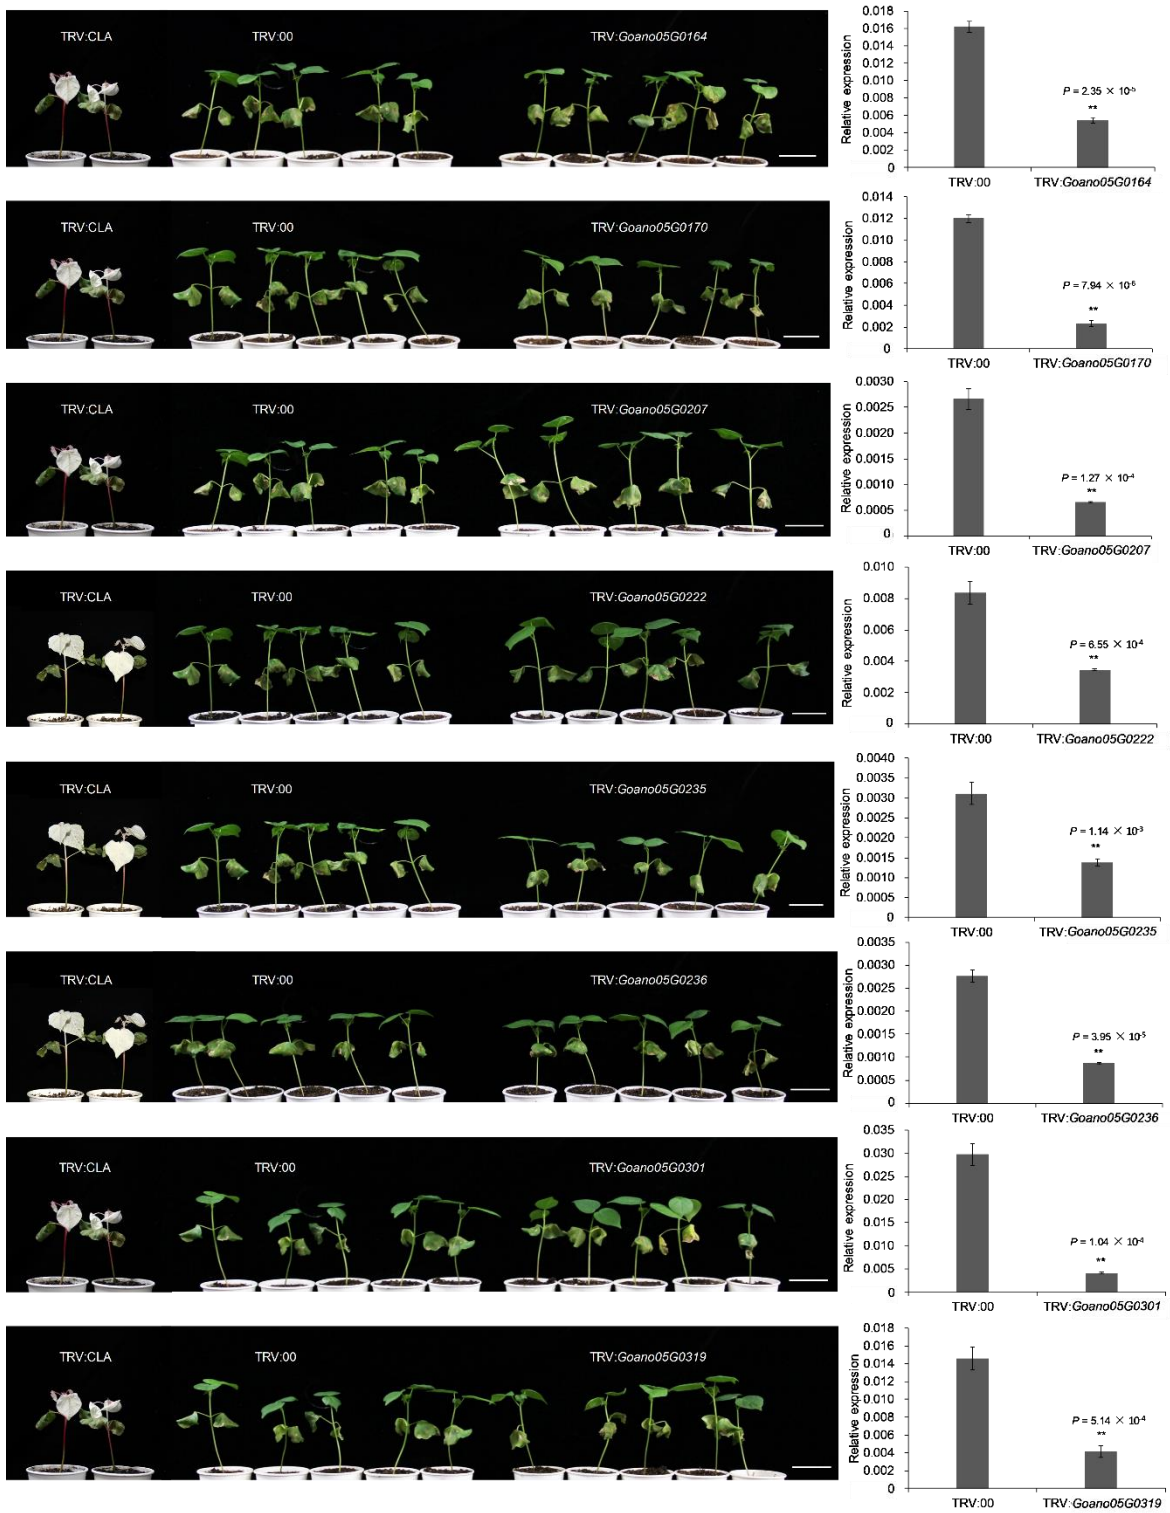

**Supplemental Figure 14.** Functional verification of eight candidate genes by VIGS. Scale bars, 5 cm. \*\* $P < 0.01$ , Student's  $t$  test.



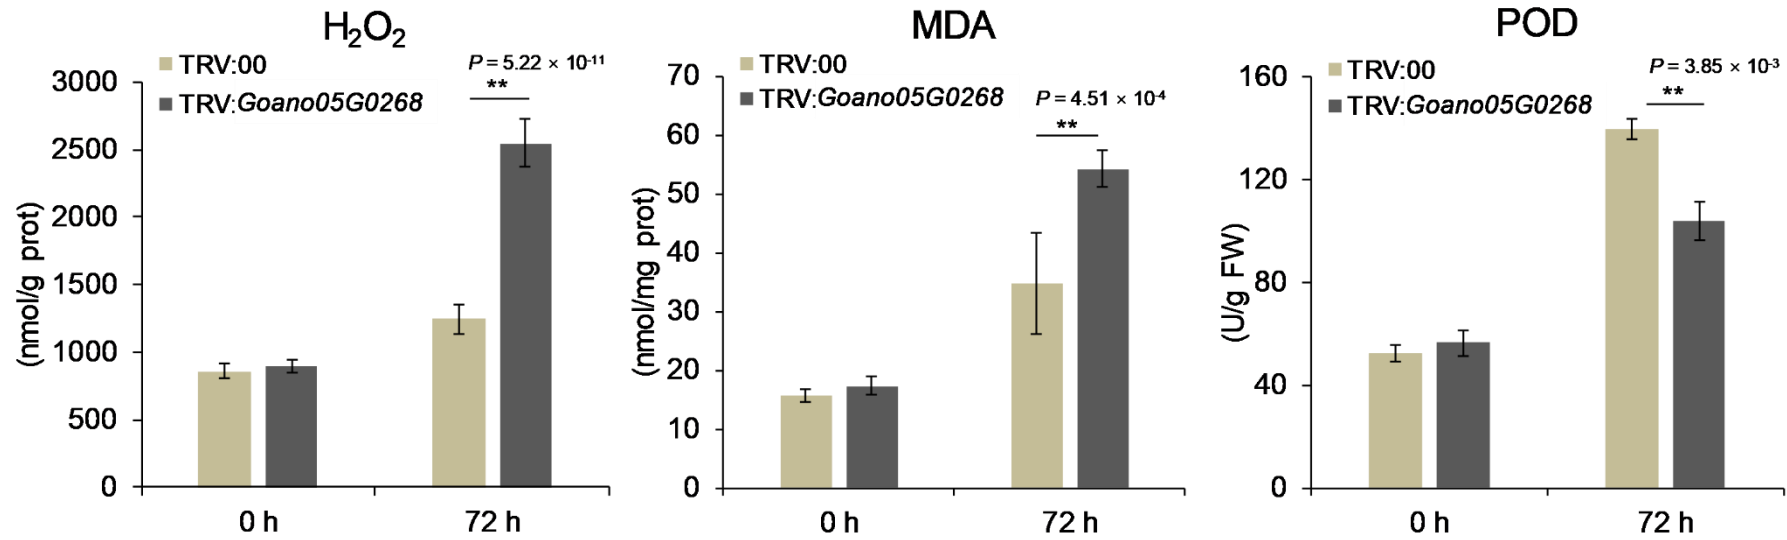

**Supplemental Figure 15.** Endogenous H<sub>2</sub>O<sub>2</sub>, MDA, and POD content in TRV:00 and TRV:Goano05G0268 cotton plants under PEG stress. \*\* $P < 0.01$ , Student's  $t$  test.

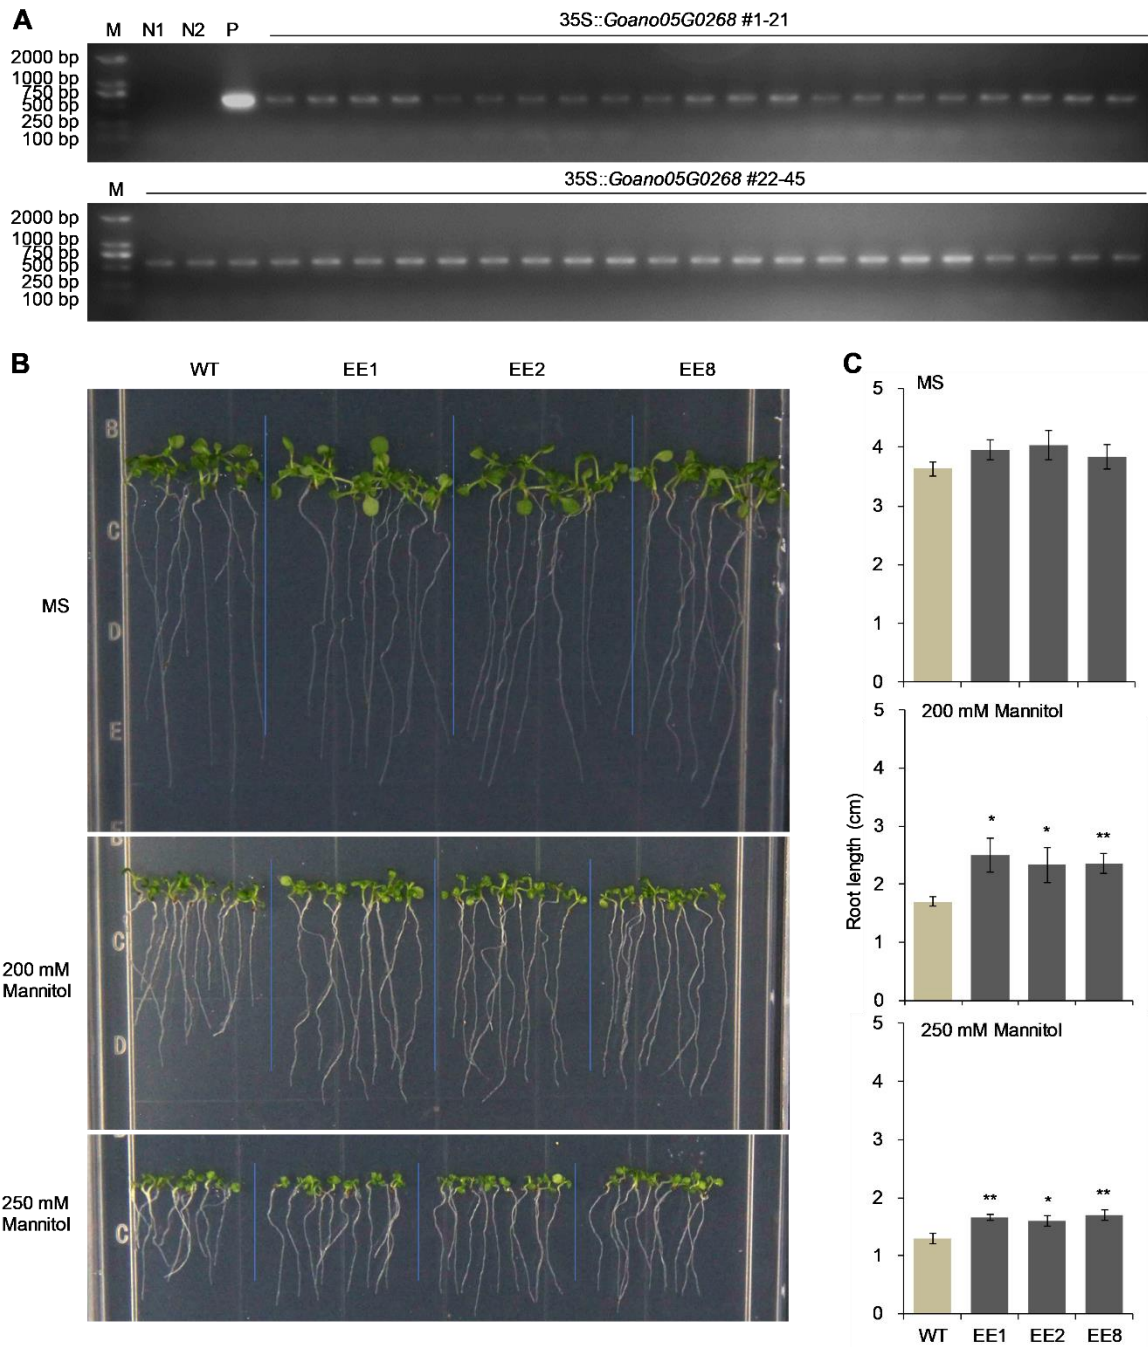

**Supplemental Figure 16.** Ectopic expression of *Goano05G0268* modulates drought response in *Arabidopsis*. **(A)** Identification of the EE transgenic lines by PCR amplification. M: DNA marker, N1: H<sub>2</sub>O control, N2: WT, P: 35S::*Goano05G0268* plasmid. **(B and C)** Root elongation of seedlings grown on MS medium with 0, 200, and 250 mM mannitol after eight days. \* $P < 0.05$ , \*\* $P < 0.01$ , Student's *t* test.

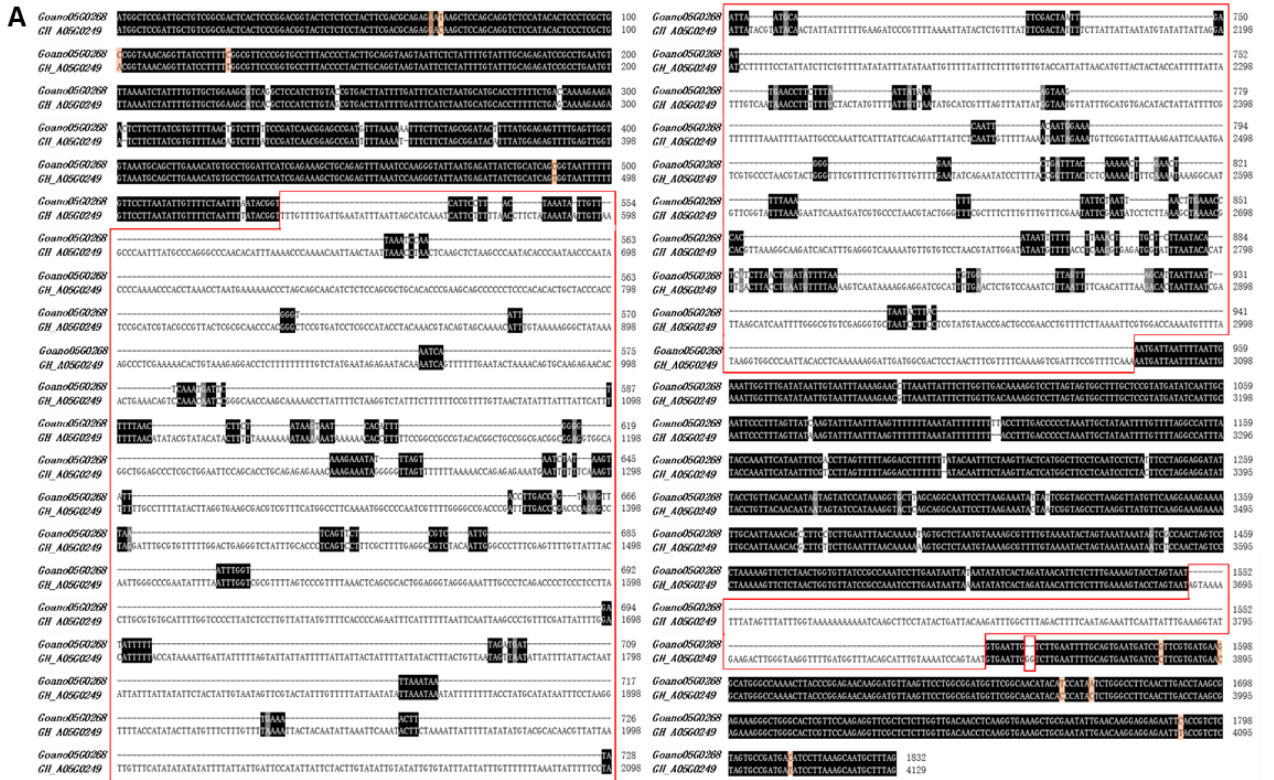

**Supplemental Figure 17. (A and B) Structural variation of *Goano05G0268* and *GH\_A05G0249* by PCR amplification in CSSL 29 and Su8289, respectively. Sequences highlighted in red boxes are structural variation sites (A). The blue lines represent structural variation sites in exons (B).**



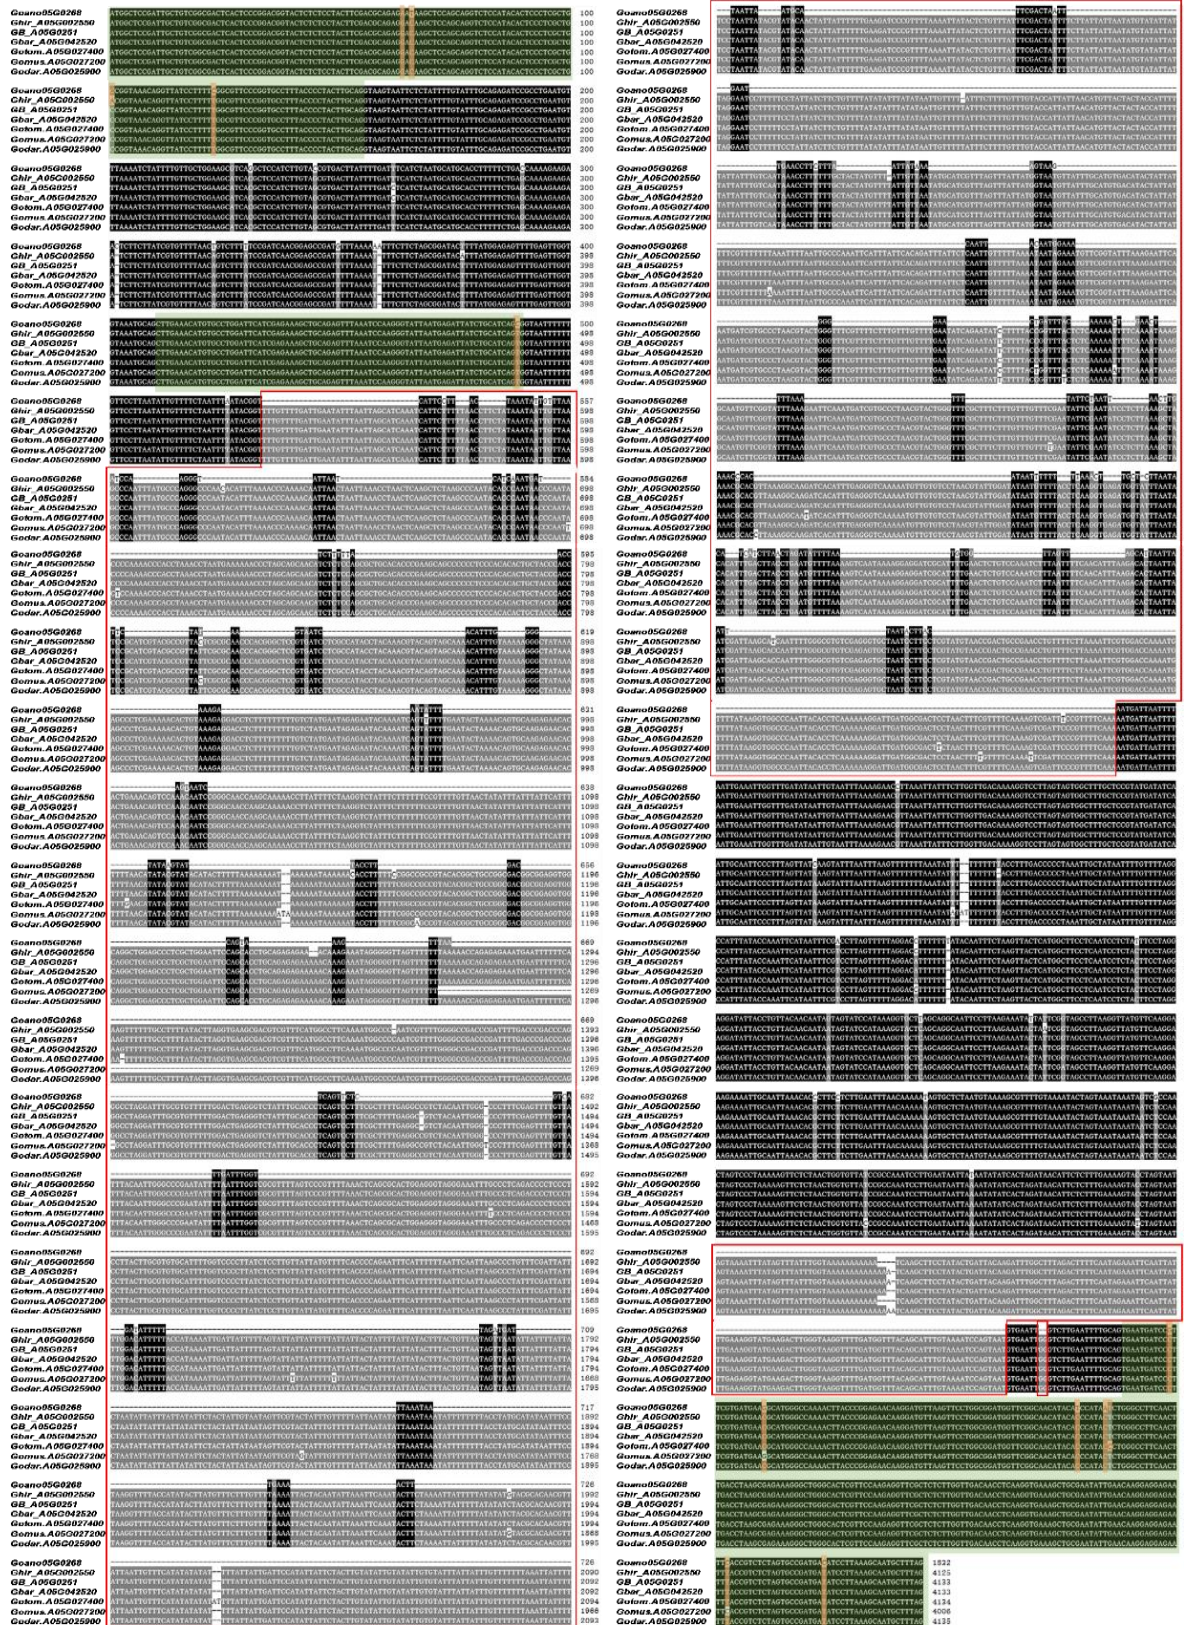

**Supplemental Figure 18.** Structural variation of *Goano05G0268* and its orthologous gene in *G. hirsutum* L. acc. TM-1, *G. barbadense* L. cv. Hai7124, *G. barbadense* L. accession 3-79, *G. tomentosum*, *G. mustelinum*, and *G. darwinii*, respectively. Sequences highlighted in red boxes are structural variation site.

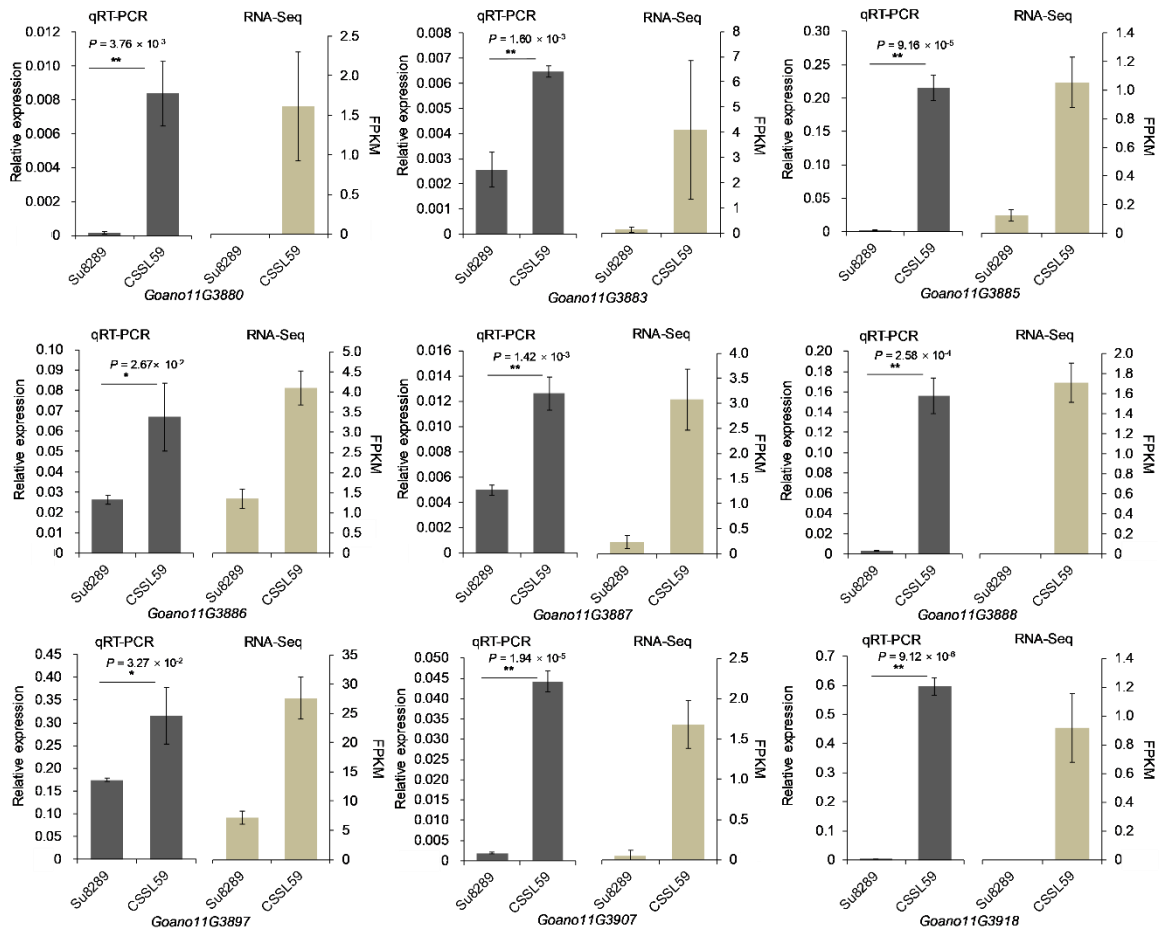

**Supplemental Figure 19.** The expression level of nine genes in fibers at 20 DPA of CSSL59 and Su8289. The left y-axes show the relative expressions according to qRT-PCR, and the right y-axes show the FPKM values obtained from RNA-seq data.  $**P < 0.01$ , Student's *t* test.

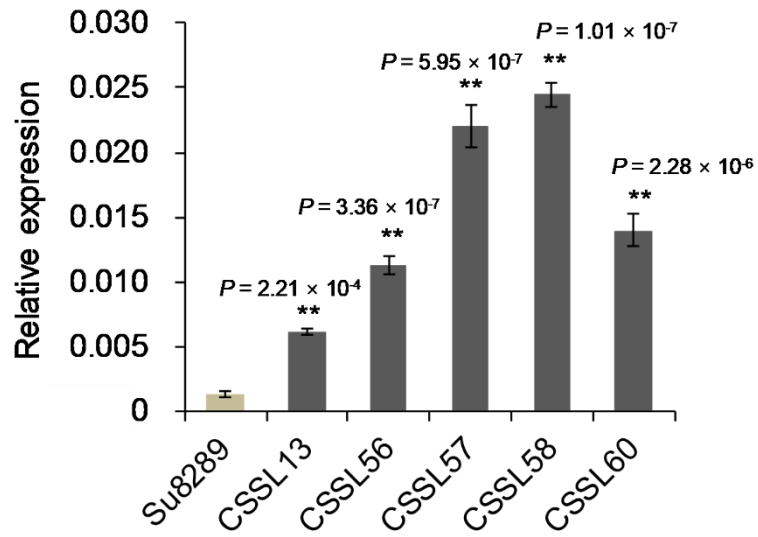

**Supplemental Figure 20.** Expression level of *Goano11G3883* in fibers at 20 DPA from Su8289, CSSL13, CSSL56, CSSL57, CSSL58, and CSSL60. \*\* $P < 0.01$ , Student's *t* test.



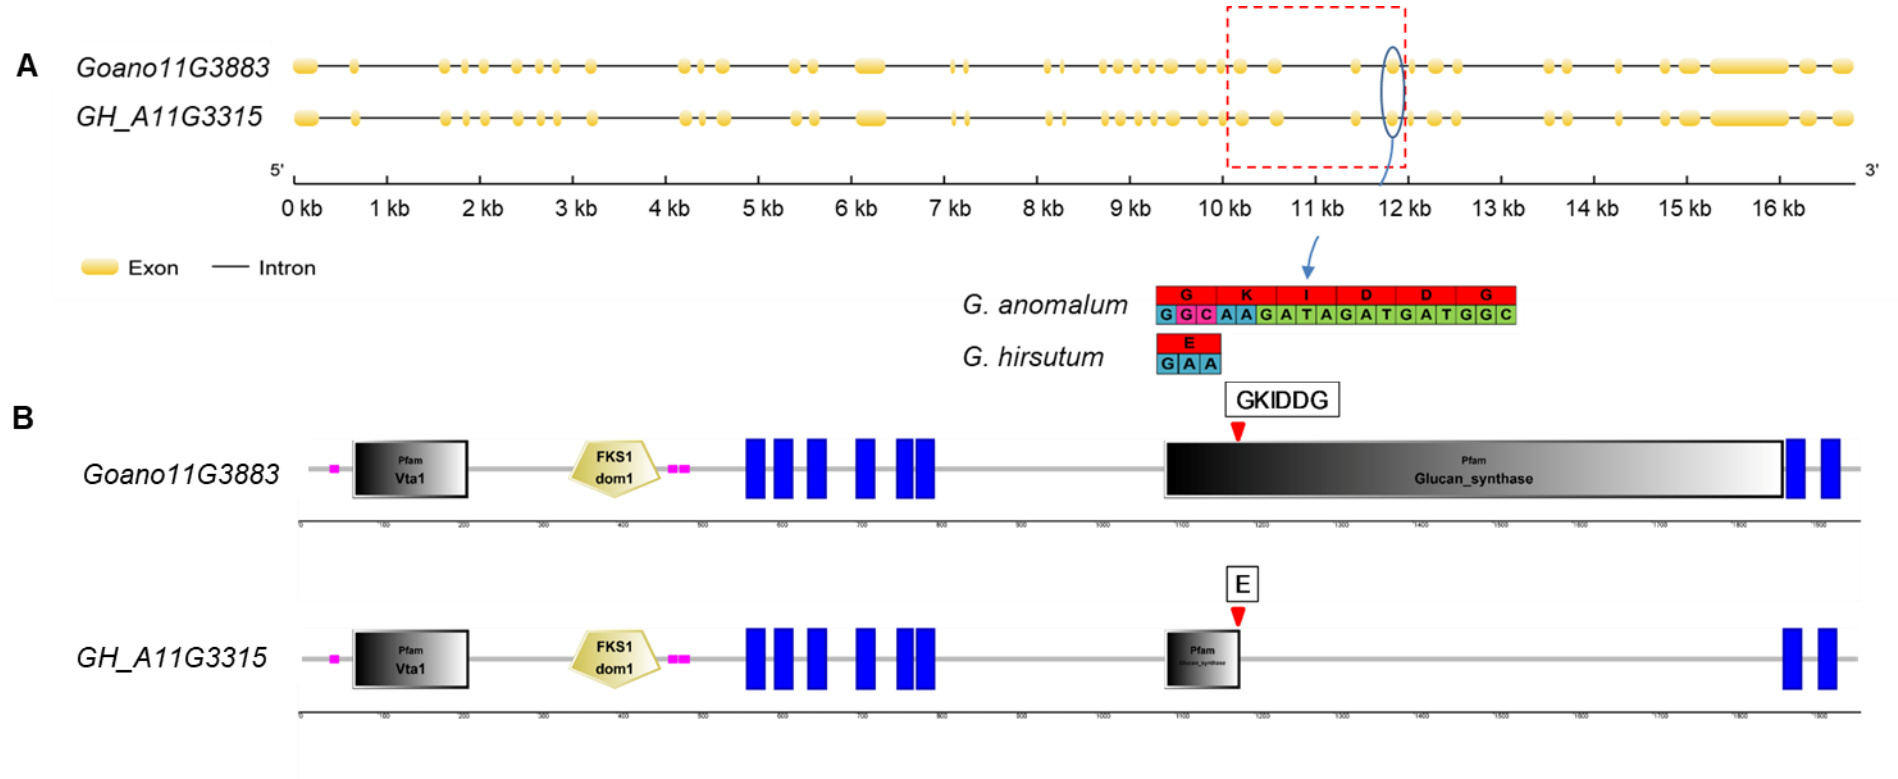

**Supplemental Figure 21. (A and B)** Structural and glucan\_synthase domain variation of *Goano11G3883* and *GH\_A11G3315* in *G. anomalum* and *G. hirsutum* TM-1, respectively.

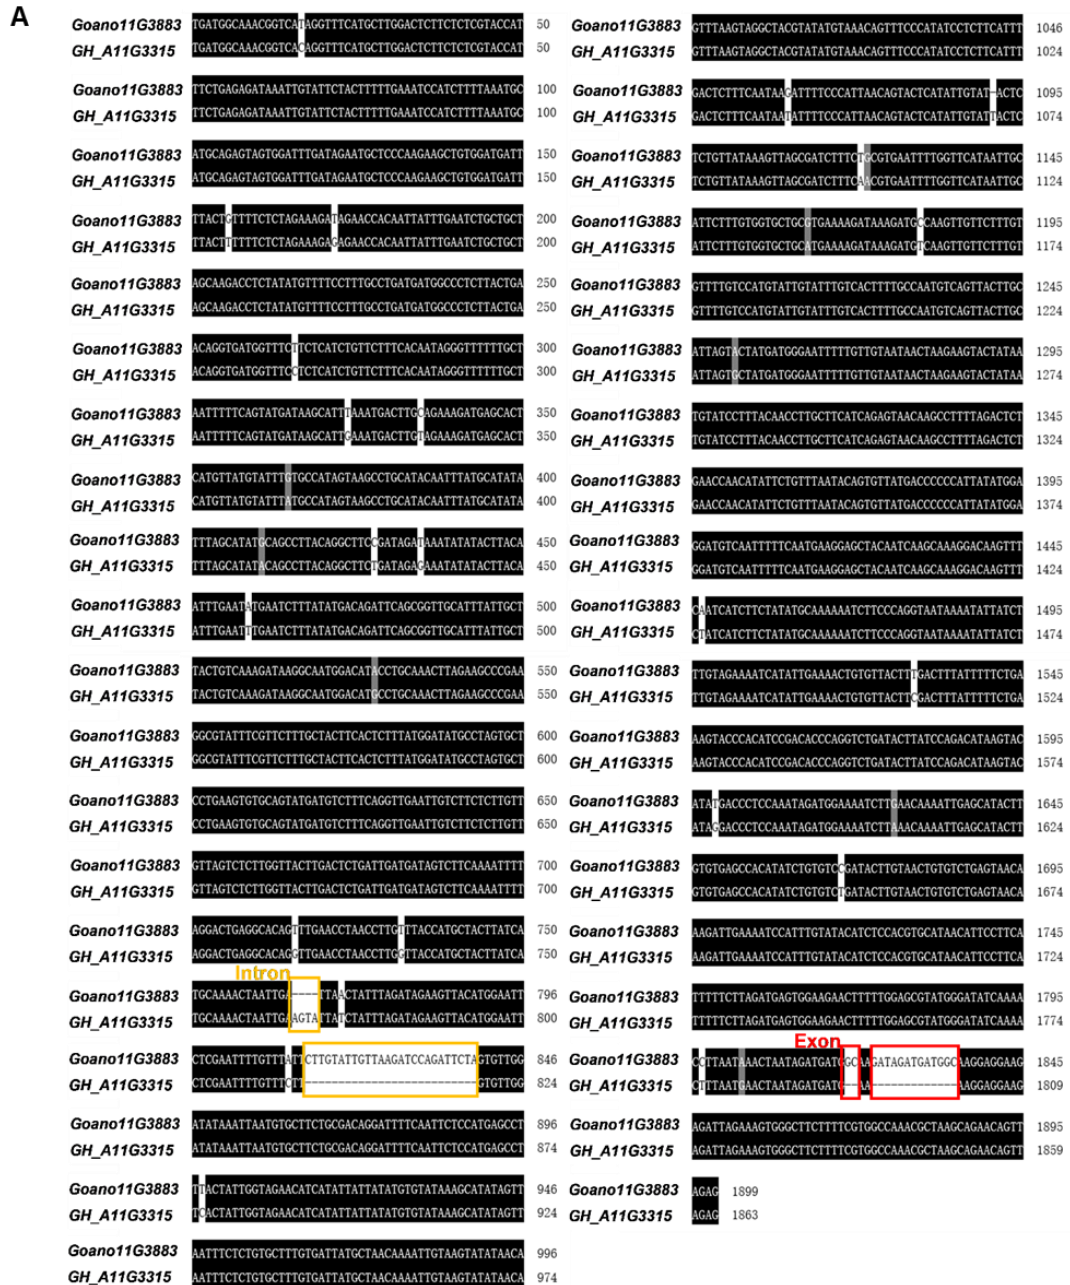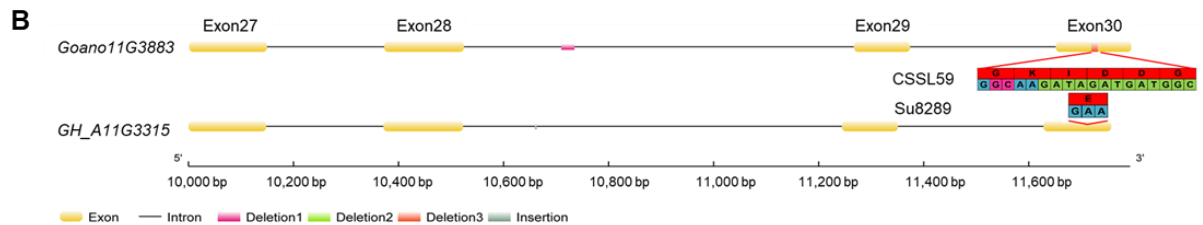

**Supplemental Figure 22. (A and B) Structural variation of *Goano11G3883* and *GH\_A11G3315* by PCR amplification in CSSL59 and Su8289, respectively. Sequences highlighted in yellow and red boxes are structural variation sites in intron and exon, respectively (A).**



**Supplemental Table 1.** Statistic of sequencing data from the PacBio Sequel and Illumina platform for *G. anomalum*.

| Type of sequencing libraries | Insert size | Read length (bp)                              | Read number | Total data (Gb) | Sequence depth (×) |
|------------------------------|-------------|-----------------------------------------------|-------------|-----------------|--------------------|
| PacBio                       | 40 kb       | 133,688 (Max)<br>9,561 (Mean)<br>16,309 (N50) | 8,647,163   | 82.68           | 64.09              |
| Illumina                     | 230 bp      | 150                                           | 155,987,099 | 46.60           | 36.12              |
|                              | 350 bp      | 150                                           | 137,948,704 | 41.33           | 32.04              |
|                              | 500 bp      | 150                                           | 149,730,393 | 44.68           | 34.64              |
| Total                        |             |                                               |             | 132.61          | 102.80             |

The statistic was based on the filtered data in PacBio library and clean data in Illumina library. Sequence depth was calculated according to the genome size of 1.29 Gb.

**Supplemental Table 2.** Summary of genome assemblies from PacBio to Hi-C for *G. anomalum*.

| Category                    | PacBio<br>(Contig) | BioNano<br>(Contig) | BioNano<br>(Scaffold) | Hi-C<br>(Contig) | Hi-C<br>(Scaffold) |
|-----------------------------|--------------------|---------------------|-----------------------|------------------|--------------------|
| Contig/Scaffold number      | 611                | 687                 | 396                   | 685              | 364                |
| Contig/Scaffold length (bp) | 1,202,351,677      | 1,202,351,677       | 1,208,495,100         | 1,202,351,483    | 1,208,248,306      |
| Contig/Scaffold Max (bp)    | 25,786,769         | 25,786,769          | 99,134,223            | 25,786,769       | 107,236,083        |
| Contig/Scaffold N50 (bp)    | 7,783,093          | 6,738,719           | 73,503,624            | 6,738,719        | 99,188,525         |
| Contig/Scaffold N90 (bp)    | 2,031,882          | 1,724,051           | 21,629,783            | 1,724,051        | 73,503,624         |
| Gap size (bp)               | 0                  | 0                   | 6,143,423             | 0                | 5,896,823          |

**Supplemental Table 3.** Summary of BioNano data quality and assembly results for *G. anomalum*.

| Category                      | <i>G. anomalum</i> |
|-------------------------------|--------------------|
| BioNano data quality          |                    |
| Filtering threshold           | 150 kb             |
| Enzyme                        | DLE-1              |
| Molecule number               | 1,153,134          |
| Total length (Mb)             | 291,883            |
| Average length (kb)           | 253                |
| Molecule N50 (kb)             | 255                |
| Label density (/100 kb)       | 13.980             |
| Genome coverage (×)           | 242.800            |
| <br>                          |                    |
| BioNano assembly results      |                    |
| Number Genome Maps            | 144                |
| Total Genome Map Length (Mb)  | 1,290.326          |
| Mean Genome Map Length (Mb)   | 8.961              |
| Median Genome Map Length (Mb) | 0.746              |
| Genome Map N50 (Mb)           | 58.216             |

**Supplemental Table 4.** Summary of Hi-C mapping data for *G. anomalum*.

| Category                  | Number of reads | Percentage (%) |
|---------------------------|-----------------|----------------|
| Unique paired alignments  | 249,816,916     | 55.27          |
| Valid read pairs          | 240,410,680     | 53.19          |
| Invalid read pairs        | 9,406,236       | 2.08           |
| Dangling end pairs        | 6,689,797       | 1.48           |
| Re-ligation pairs         | 2,410,771       | 0.53           |
| Self-cycle pairs          | 303,540         | 0.07           |
| Dumped pairs              | 2,128           | 0.00           |
| Multiple pairs alignments | 131,108,882     | 29.01          |
| Pairs with singleton      | 50,686,398      | 11.21          |
| Unmapped pairs            | 20,353,034      | 4.50           |
| Total read pairs          | 451,965,230     | 100.00         |

**Supplemental Table 5.** Characteristics of the 13 pseudo-chromosomes in the final genome assembly of *G. anomalum*.

| Pseudo-chromosome | Number of scaffolds <sup>a</sup> | Size (bp)     |
|-------------------|----------------------------------|---------------|
| Chr.01            | 3                                | 99,188,525    |
| Chr.02            | 1                                | 73,503,624    |
| Chr.03            | 3                                | 107,236,083   |
| Chr.04            | 1                                | 85,652,033    |
| Chr.05            | 3                                | 86,126,817    |
| Chr.06            | 10                               | 99,994,996    |
| Chr.07            | 4                                | 83,060,063    |
| Chr.08            | 3                                | 104,733,974   |
| Chr.09            | 2                                | 72,545,696    |
| Chr.10            | 2                                | 101,529,486   |
| Chr.11            | 4                                | 102,973,240   |
| Chr.12            | 3                                | 88,411,662    |
| Chr.13            | 2                                | 93,713,888    |
| Total             | 41                               | 1,198,670,087 |

<sup>a</sup>The scaffolds here were obtained from the BioNano assembly and some of them were truncated by others in the following Hi-C process.

**Supplemental Table 6.** Summary of genome base content for *G. anomalum*.

| Base type | Number (bp)   | Percentage of genome (%) |
|-----------|---------------|--------------------------|
| A         | 395,389,494   | 32.72                    |
| T         | 395,196,517   | 32.71                    |
| C         | 206,049,696   | 17.05                    |
| G         | 205,715,776   | 17.03                    |
| N         | 5,896,823     | 0.49                     |
| Total     | 1,208,248,306 | 100.00                   |
| G + C     | 411,765,472   | 34.25 <sup>a</sup>       |

<sup>a</sup>GC content of the genome without N.

**Supplemental Table 7.** Evaluation of genome assembly integrity of *G. anomalum* using the BUSCO method.

| BUSCOs                          | Number | Percentage (%) |
|---------------------------------|--------|----------------|
| Complete BUSCOs (C)             | 2,303  | 99.01          |
| Complete single-copy BUSCOs (S) | 2,086  | 89.68          |
| Complete duplicated BUSCOs (D)  | 217    | 9.33           |
| Fragmented BUSCOs (F)           | 10     | 0.43           |
| Missing BUSCOs (M)              | 13     | 0.56           |
| Total BUSCO groups searched     | 2,326  | 100            |

BUSCO: Benchmarking Universal Single-Copy Ortholog.

**Supplemental Table 8.** Evaluation of genome assembly integrity of *G. anomalum* using the CEGMA method.

|                                          | Complete + Partial CEGMAs |                | Total CEGMA groups searched |                |
|------------------------------------------|---------------------------|----------------|-----------------------------|----------------|
|                                          | number                    | Percentage (%) | number                      | Percentage (%) |
| <i>G. anomalum</i>                       | 242                       | 97.58          | 248                         | 100            |
| <i>G. anomalum</i> (Grover et al., 2021) | 243                       | 97.98          | 248                         | 100            |

CEGMA: Core Eukaryotic Genes Mapping Approach.



**Supplemental Table 9.** Summary of Illumina short reads mapping in *G. anomalum* genome.

|        | Category                 | Percentage (%) |
|--------|--------------------------|----------------|
| Reads  | Mapping rate             | 97.25          |
|        | Average sequencing depth | 96.93          |
|        | Coverage                 | 99.90          |
| Genome | Coverage at least 4×     | 99.84          |
|        | Coverage at least 10×    | 99.74          |
|        | Coverage at least 20×    | 99.42          |

**Supplemental Table 10.** The sequence coverage of the *G. anomalum* genome by homologous search using RNA-seq data.

| Dataset    | Number  | Total length (bp) | Bases covered<br>by assembly (%) | Sequences covered<br>by assembly (%) | with > 90% sequence<br>in one scaffold |         | with > 50% sequence<br>in one scaffold |         |
|------------|---------|-------------------|----------------------------------|--------------------------------------|----------------------------------------|---------|----------------------------------------|---------|
|            |         |                   |                                  |                                      | Number                                 | Percent | Number                                 | Percent |
| > 500 bp   | 141,863 | 239,349,699       | 90.948                           | 88.648                               | 113,205                                | 79.799  | 124,766                                | 87.948  |
| > 1,000 bp | 91,314  | 203,490,609       | 93.068                           | 93.668                               | 75,296                                 | 82.458  | 85,040                                 | 93.129  |
| > 2,000 bp | 42,452  | 132,559,496       | 94.850                           | 96.928                               | 34,882                                 | 82.168  | 40,925                                 | 96.403  |
| > 5,000 bp | 2,683   | 16,839,815        | 95.370                           | 98.658                               | 2,091                                  | 77.935  | 2,626                                  | 97.876  |

**Supplemental Table 11.** Summary of gene structure annotation in *G. anomalum* genome.

|              | Gene set                    | Number  | Average gene length (bp) | Average CDS length (bp) | Average exons per gene | Average exon length (bp) | Average intron length (bp) |
|--------------|-----------------------------|---------|--------------------------|-------------------------|------------------------|--------------------------|----------------------------|
| De novo      | Augustus                    | 58,306  | 2,113.65                 | 969.23                  | 4.04                   | 239.88                   | 376.39                     |
|              | GlimmerHMM                  | 110,304 | 9,227.34                 | 583.06                  | 2.79                   | 208.71                   | 4,819.37                   |
|              | SNAP                        | 38,739  | 8,617.61                 | 548                     | 3.75                   | 146.15                   | 2,934.88                   |
|              | Geneid                      | 85,816  | 4,341.16                 | 694.95                  | 3.82                   | 181.78                   | 1,291.55                   |
|              | Genscan                     | 58,848  | 12,145.66                | 1,010.16                | 5.15                   | 196.30                   | 2,685.93                   |
| Homolog      | <i>Arabidopsis thaliana</i> | 75,480  | 1,294.09                 | 679.65                  | 2.50                   | 271.49                   | 408.71                     |
|              | <i>Gossypium arboreum</i>   | 39,986  | 2,687.86                 | 1,190.45                | 3.96                   | 300.86                   | 506.43                     |
|              | <i>Gossypium hirsutum</i>   | 66,844  | 2,412.87                 | 997.83                  | 3.32                   | 300.67                   | 610.27                     |
|              | <i>Gossypium raimondii</i>  | 70,338  | 1,622.10                 | 791.99                  | 3.07                   | 258.21                   | 401.56                     |
|              | <i>Populus trichocarpa</i>  | 39,204  | 2,619.07                 | 1,169.22                | 3.72                   | 314.34                   | 533.12                     |
|              | <i>Theobroma cacao</i>      | 34,369  | 2,808.17                 | 1,310.04                | 4.01                   | 326.70                   | 497.73                     |
| RNA-seq      | PASA                        | 82,914  | 2,728.24                 | 1,001.98                | 4.89                   | 204.72                   | 443.28                     |
|              | Cufflinks                   | 54,828  | 4,768.84                 | 2,110.71                | 6.42                   | 328.77                   | 490.43                     |
| EVM          |                             | 64,660  | 2,266.69                 | 906.12                  | 3.84                   | 235.89                   | 478.87                     |
| Pasa-update* |                             | 64,373  | 2,236.80                 | 907.45                  | 3.82                   | 237.49                   | 471.23                     |
| Final set*   |                             | 42,752  | 3,140.07                 | 1,099.98                | 4.75                   | 291.92                   | 464.73                     |

\* It contains UTR region, others do not contain UTR region.

**Supplemental Table 12.** Summary of gene function annotation by using different databases.

|             | Database  | Number | Percent (%) |
|-------------|-----------|--------|-------------|
| Annotated   |           | 41,592 | 97.29       |
|             | Swissprot | 30,288 | 70.85       |
|             | Nr        | 41,561 | 97.21       |
|             | KEGG      | 30,706 | 71.82       |
|             | InterPro  | 33,900 | 79.29       |
|             | GO        | 21,680 | 50.71       |
|             | Pfam      | 31,663 | 74.06       |
| Unannotated |           | 1,160  | 2.71        |

**Supplemental Table 13.** Summary of non-coding RNAs in the *G. anomalum* genome.

| Type     | Copy number | Average length (bp) | Total length (bp) |
|----------|-------------|---------------------|-------------------|
| miRNA    | 262         | 129.67              | 33,974            |
| tRNA     | 1,085       | 74.73               | 81,078            |
| rRNA     | 774         | 296.19              | 229,250           |
| 18S      | 110         | 1,277.05            | 140,476           |
| 28S      | 307         | 138.80              | 42,613            |
| 5.8S     | 82          | 160.12              | 13,130            |
| 5S       | 275         | 120.11              | 33,031            |
| snRNA    | 6,064       | 107.49              | 651,847           |
| CD-box   | 5,872       | 106.47              | 625,211           |
| HACA-box | 52          | 125.73              | 6,538             |
| splicing | 140         | 143.56              | 20,098            |
| Total    | 8,185       |                     | 996,149           |

**Supplemental Table 14.** The summary of repetitive sequences.

| Type                     | Number  | Length (bp) | % (genome) |
|--------------------------|---------|-------------|------------|
| Class I: Retrotransposon | 840,690 | 728,632,679 | 60.30      |
| LTR retrotransposon      | 805,038 | 714,153,605 | 59.11      |
| Copia                    | 136,198 | 66,734,309  | 5.52       |
| Gypsy                    | 598,287 | 607,203,108 | 50.25      |
| Unclassified             | 70,553  | 40,216,188  | 3.33       |
| non-LTR Retroelement     | 35,652  | 14,479,074  | 1.20       |
| LINE                     | 35,566  | 14,415,724  | 1.20       |
| SINE                     | 86      | 63,350      | 0.0052     |
| Class II: DNA transposon | 32,627  | 13,910,223  | 1.15       |
| TIR/MULE-MuDR            | 14,505  | 6,577,793   | 0.54       |
| TIR/CMC                  | 6,354   | 2,606,893   | 0.22       |
| TIR/P                    | 432     | 290,271     | 0.02       |
| TIR/PIF                  | 2,593   | 1,034,534   | 0.09       |
| TIR/TcMar                | 175     | 69,345      | 0.0057     |
| TIR/hAT                  | 6,511   | 2,412,317   | 0.20       |
| Helitron/Helitron        | 1,623   | 775,713     | 0.06       |
| Unclassified             | 434     | 143,357     | 0.01       |
| Other                    | 2,172   | 1,620,171   | 0.13       |
| Simple_repeat            | 2,172   | 1,620,171   | 0.13       |
| unknown                  | 20,680  | 12,118,599  | 1.00       |
| Total                    | 896,169 | 756,281,672 | 62.59      |

**Supplemental Table 15.** The summary of chromosomal rearrangements between *G. anomalum* and other extant diploid cotton genomes. (included as a separate EXCEL file)

**Supplemental Table 16.** Primers of 230 SSR markers. (included as a separate EXCEL file)

**Supplemental Table 17.** Population size for marker-assisted selection.

| Chr.   | BC <sub>3</sub> F <sub>1</sub> | BC <sub>4</sub> F <sub>1</sub> | BC <sub>4</sub> F <sub>2</sub> | BC <sub>4</sub> F <sub>3</sub> | BC <sub>4</sub> F <sub>4</sub> |
|--------|--------------------------------|--------------------------------|--------------------------------|--------------------------------|--------------------------------|
| Chr.01 | 888 (86)*                      | 774 (50)*                      | 752 (132)*                     | 145                            | 127                            |
| Chr.02 | 495 (77)                       | 464 (119)                      | 487 (69)                       | 117                            | 155                            |
| Chr.03 | 243 (32)                       | 696 (503)                      | 227 (108)                      | 20                             | 55                             |
| Chr.04 | 165 (41)                       | 348 (123)                      | 240 (94)                       | 145                            | 210                            |
| Chr.05 | 170 (64)                       | 318 (40)                       | 347 (48)                       | 113                            | 104                            |
| Chr.06 | 299 (228)                      | 869 (761)                      | 347 (112)                      | 136                            | 214                            |
| Chr.07 | 121 (91)                       | 443 (443)                      | 207 (170)                      | 47                             | 98                             |
| Chr.08 | 275 (275)                      | 392 (392)                      | 183 (112)                      | 58                             | 121                            |
| Chr.09 | 209 (114)                      | 588 (410)                      | 235 (108)                      | 66                             | 181                            |
| Chr.10 | 250 (201)                      | 550 (493)                      | 259 (188)                      | 245                            | 293                            |
| Chr.11 | 827 (63)                       | 1,377 (57)                     | 706 (46)                       | 267                            | 395                            |
| Chr.12 | 128 (65)                       | 795 (589)                      | 247 (69)                       | 73                             | 33                             |
| Chr.13 | 261 (240)                      | 926 (926)                      | 306 (143)                      | 101                            | 239                            |
| Total  | 4,331 (1,577)                  | 8,540 (4,906)                  | 4,543 (1,399)                  | 1,533                          | 2,225                          |

\*The data in parentheses is the number of plants from alien addition lines.



**Supplemental Table 18.** The number of recombination types identified in each generation.

| Chr.   | BC <sub>2</sub> F <sub>1</sub> | BC <sub>3</sub> F <sub>1</sub> | BC <sub>4</sub> F <sub>1</sub> | BC <sub>4</sub> F <sub>2</sub> | BC <sub>4</sub> F <sub>3</sub> | BC <sub>4</sub> F <sub>4</sub> |
|--------|--------------------------------|--------------------------------|--------------------------------|--------------------------------|--------------------------------|--------------------------------|
| Chr.01 | 3                              | 4                              | 9                              | 8                              | 8                              | 13                             |
| Chr.02 | 4                              | 5                              | 6                              | 3 (2)                          | 3 (2)                          | 3                              |
| Chr.03 | 1                              | 1                              | 3                              | 1 (1)                          | 1 (1)                          | 1 (1)                          |
| Chr.04 | 1                              | 5                              | 3                              | 2 (1)                          | 2 (1)                          | 3                              |
| Chr.05 | 4                              | 6                              | 6                              | 6                              | 7                              | 7                              |
| Chr.06 | 2                              | 2                              | 3                              | 5                              | 5                              | 6 (1)                          |
| Chr.07 | 1                              | 0                              | 1                              | 1                              | 1                              | 1                              |
| Chr.08 | 1                              | 0                              | 3                              | 1                              | 1                              | 2 (1)                          |
| Chr.09 | 3                              | 2                              | 2                              | 3 (1)                          | 3 (1)                          | 3 (1)                          |
| Chr.10 | 1                              | 2                              | 2                              | 1                              | 1                              | 3                              |
| Chr.11 | 11                             | 11                             | 11                             | 13 (1)                         | 14 (1)                         | 17                             |
| Chr.12 | 3                              | 2                              | 3                              | 3                              | 3                              | 3                              |
| Chr.13 | 1                              | 0                              | 4                              | 4                              | 4                              | 4                              |
| Total  | 36                             | 40                             | 56                             | 51 (6)                         | 53 (6)                         | 74* (4)                        |

The data in the parentheses denotes the number of hybrid recombination types in the generations produced by selfing.

\*Since some recombination types containing substitution segments from different chromosomes, the total number of recombination types was greater than the total number accumulated in chromosome units.

**Supplemental Table 19.** Summary of introgression segments. (included as a separate EXCEL file)

**Supplemental Table 20.** Genome coverage of *G. anomalum* substitution segments in the CSSL population.

| Chr.   | B <sub>1</sub> | B <sub>1</sub> -introgression | Coverage (%) |
|--------|----------------|-------------------------------|--------------|
| Chr.01 | 176.40         | 176.40                        | 100.00       |
| Chr.02 | 191.50         | 156.14                        | 81.54        |
| Chr.03 | 118.70         | 71.10                         | 59.90        |
| Chr.04 | 101.60         | 101.60                        | 100.00       |
| Chr.05 | 263.90         | 116.90                        | 44.30        |
| Chr.06 | 167.80         | 146.10                        | 87.07        |
| Chr.07 | 195.40         | 119.60                        | 61.21        |
| Chr.08 | 183.50         | 183.50                        | 100.00       |
| Chr.09 | 172.60         | 157.50                        | 91.25        |
| Chr.10 | 165.50         | 29.60                         | 17.89        |
| Chr.11 | 216.20         | 216.20                        | 100.00       |
| Chr.12 | 159.50         | 53.25                         | 33.39        |
| Chr.13 | 198.10         | 140.80                        | 71.08        |
| Total  | 2,310.70       | 1,668.69                      | 72.22        |

**Supplemental Table 21.** Summary of Illumina re-sequencing data for CSSLs. (included as a separate EXCEL file)

**Supplemental Table 22.** Descriptive statistics of nine traits in the *G. anomalum*-derived CSSL population in multiple environments. (included as a separate EXCEL file)

**Supplemental Table 23.** The detected segments/QTLs of the agronomic traits in the *G. anomalum*-derived CSSL population. (included as a separate EXCEL file)

**Supplemental Table 24.** Summary of RNA-Seq data for CSSL29 and Su8289 during PEG stress.

| Sample       | Raw reads  | Clean reads | Clean base (Gb) | Error rate (%) | Q20 (%) | Q30 (%) | GC content (%) |
|--------------|------------|-------------|-----------------|----------------|---------|---------|----------------|
| CSSL29_0h_1  | 61,426,990 | 60,361,996  | 9.05            | 0.03           | 97.82   | 93.65   | 44.75          |
| CSSL29_0h_2  | 44,191,544 | 43,628,714  | 6.54            | 0.03           | 97.73   | 93.43   | 44.47          |
| CSSL29_0h_3  | 50,666,142 | 49,874,820  | 7.48            | 0.03           | 97.78   | 93.54   | 44.40          |
| CSSL29_6h_1  | 52,910,090 | 51,782,160  | 7.77            | 0.03           | 97.73   | 93.49   | 44.81          |
| CSSL29_6h_2  | 58,005,932 | 56,894,338  | 8.53            | 0.03           | 97.83   | 93.69   | 44.89          |
| CSSL29_6h_3  | 47,752,394 | 47,012,056  | 7.05            | 0.03           | 97.86   | 93.77   | 44.97          |
| CSSL29_12h_1 | 53,507,968 | 52,325,294  | 7.85            | 0.03           | 97.88   | 93.81   | 44.51          |
| CSSL29_12h_2 | 55,945,848 | 54,851,274  | 8.23            | 0.03           | 97.86   | 93.76   | 44.52          |
| CSSL29_12h_3 | 50,944,974 | 50,096,754  | 7.51            | 0.03           | 97.74   | 93.48   | 44.55          |
| CSSL29_24h_1 | 49,578,464 | 48,538,146  | 7.28            | 0.03           | 97.06   | 91.96   | 43.86          |
| CSSL29_24h_2 | 44,966,346 | 44,162,348  | 6.62            | 0.03           | 97.76   | 93.58   | 43.75          |
| CSSL29_24h_3 | 46,933,152 | 45,592,854  | 6.84            | 0.03           | 97.74   | 93.49   | 43.78          |
| CSSL29_72h_1 | 51,561,758 | 50,548,304  | 7.58            | 0.03           | 97.69   | 93.37   | 44.36          |
| CSSL29_72h_2 | 39,450,540 | 38,676,436  | 5.80            | 0.03           | 97.69   | 93.34   | 44.48          |
| CSSL29_72h_3 | 47,329,794 | 46,003,272  | 6.90            | 0.03           | 97.75   | 93.53   | 44.34          |
| Su8289_0h_1  | 50,433,980 | 48,946,092  | 7.34            | 0.03           | 97.40   | 92.68   | 43.77          |
| Su8289_0h_2  | 57,284,664 | 55,813,900  | 8.37            | 0.03           | 97.68   | 93.38   | 43.70          |
| Su8289_0h_3  | 50,878,936 | 49,550,684  | 7.43            | 0.03           | 97.81   | 93.64   | 43.84          |
| Su8289_6h_1  | 54,160,104 | 52,570,184  | 7.89            | 0.03           | 97.80   | 93.64   | 44.83          |
| Su8289_6h_2  | 48,345,034 | 47,398,424  | 7.11            | 0.03           | 97.77   | 93.50   | 45.03          |
| Su8289_6h_3  | 47,582,286 | 46,571,368  | 6.99            | 0.03           | 97.93   | 93.94   | 44.27          |
| Su8289_12h_1 | 45,899,858 | 44,919,500  | 6.74            | 0.03           | 97.69   | 93.41   | 44.26          |
| Su8289_12h_2 | 54,921,350 | 53,900,484  | 8.09            | 0.03           | 97.69   | 93.41   | 44.33          |
| Su8289_12h_3 | 42,819,618 | 41,180,122  | 6.18            | 0.03           | 97.78   | 93.60   | 44.35          |
| Su8289_24h_1 | 49,719,686 | 48,971,020  | 7.35            | 0.03           | 97.69   | 93.39   | 44.52          |
| Su8289_24h_2 | 71,473,464 | 70,755,984  | 10.61           | 0.03           | 97.78   | 93.59   | 44.66          |
| Su8289_24h_3 | 43,695,654 | 43,176,316  | 6.48            | 0.03           | 97.48   | 92.79   | 44.61          |
| Su8289_72h_1 | 53,836,832 | 52,959,380  | 7.94            | 0.03           | 97.76   | 93.47   | 44.13          |
| Su8289_72h_2 | 53,247,538 | 52,145,682  | 7.82            | 0.03           | 97.61   | 93.15   | 44.15          |
| Su8289_72h_3 | 53,473,164 | 52,345,388  | 7.85            | 0.03           | 97.68   | 93.35   | 44.08          |

**Supplemental Table 25.** The annotation and expression level of 20 genes in CSSL29 and Su8289 during PEG stress. (included as a separate EXCEL file).

**Supplemental Table 26.** The qRT-PCR primers for nine candidate genes on the JAAS0803–JAAS5604 interval.

| Gene ID             | Forward PCR primer (5'–3') | Reverse PCR primer (5'–3') |
|---------------------|----------------------------|----------------------------|
| <i>Goano05G0268</i> | AAGCTGCGAATATTGAACA        | CAAGATGACCTCCGTAGATA       |
| <i>Goano05G0164</i> | CTATGTACGCCGAGTTAATATG     | CTTCTTCTTCTTCAGCATCC       |
| <i>Goano05G0170</i> | AAAGTTCCCATTCATCATCAC      | TCAAGCCTTAGACAAGTCAT       |
| <i>Goano05G0207</i> | CACCAACAATAGCAACAATC       | TTGAACTCATTAGCATCGTT       |
| <i>Goano05G0222</i> | CTTTCCTTCCATTCTCCAAA       | TCATCCATATCTTCATTCATAGAG   |
| <i>Goano05G0235</i> | TGGATGGAGTGACCTCATACAA     | ATCAAGAAGGAGATGTCCAAAGC    |
| <i>Goano05G0236</i> | TTCTCAACTGTGCCTCCTAC       | GTCCAGCATTATTAACACCATCTT   |
| <i>Goano05G0301</i> | AGCAAGACAAGAAGAAGAAG       | TCTCAGATGAGTTAGGTCC        |
| <i>Goano05G0319</i> | TCTCAATCTCAAAGTAGAAAGAAG   | CAACCATGAACAAGACCATAT      |

**Supplemental Table 27.** The VIGS primers for nine candidate genes on the JAAS0803–JAAS5604 interval.

| Gene ID             | Forward PCR primer (5'–3')      | Reverse PCR primer (5'–3')      |
|---------------------|---------------------------------|---------------------------------|
| <i>Goano05G0268</i> | CGGGATCCGGTCTCCATACACTCCCTCG    | CGAGTCATGACCTCCGTAGATAAAAAG     |
| <i>Goano05G0164</i> | CGGAATTCTTCGTGAAAGCCGAGGAATA    | CGGGATCCGAGATTGCGTCATTGGTCAT    |
| <i>Goano05G0170</i> | CGGGATCCAAGTCCCATTTCATCATCAC    | CGAGCTCACATATGGACTTCTTAACTC     |
| <i>Goano05G0207</i> | CGGAATTCAGCAACAATCAGACGAGCCA    | CGGGATCCCTCAAGTTACTAGCATACGC    |
| <i>Goano05G0222</i> | CGGGATCCGCACCTCCTCCTCACTTCTG    | CGAGCTCACCTAACCCTAAACCCTAAT     |
| <i>Goano05G0235</i> | CGGGATCCAGGCTCTTGTTCTTGTTTCT    | CGAGCTCTTTCATTGTTTCATCCATAT     |
| <i>Goano05G0236</i> | CGGGATCCCACAAGGATGGCAAACCTGGC   | CGAGCTCAGGATGGCATTGCTCTTTAT     |
| <i>Goano05G0301</i> | CGGAATTCCTGCTCACCGCCATAAGCGAAAT | CGGGATCCCTTCTTGCTTCTTTCACCTACAT |
| <i>Goano05G0319</i> | CGGGATCCCAGGAGCAGAAACAACCATC    | CGAGCTCGCTAAGGTGGTGGGGAGAAT     |



**Supplemental Table 28.** The PCR primers of *Goano05G0268* and its orthologous gene *GH\_A05G0249* in Su8289.

| Gene ID             | Sample | Forward PCR primer (5'–3') | Reverse PCR primer (5'–3') |
|---------------------|--------|----------------------------|----------------------------|
| <i>Goano05G0268</i> | CSSL29 | CAACCGACTTACATCATCACCTTC   | AACAAGATGACCTCCGTAGATAAA   |
| <i>GH_A05G0249</i>  | Su8289 | CAACTGCCTTAGCAACCGACTT     | TATTGCCATAACCATCAAGTGC     |

**Supplemental Table 29.** Structural variation statistics of *Goano05G0268* and its orthologous gene in other allotetraploid cotton species.

| Genome            | Assembly                      | Gene name               | Deletion<br>(bp) | Insertion-1<br>(bp) | Insertion-2<br>(bp) | Insertion-3<br>(bp) | SNP in exon |
|-------------------|-------------------------------|-------------------------|------------------|---------------------|---------------------|---------------------|-------------|
| B <sub>1</sub>    | <i>G. anomalum</i>            | <i>Goano05G0268</i>     |                  |                     |                     |                     |             |
| (AD) <sub>1</sub> | <i>G. hirsutum</i> HAU v1.1   | <i>Ghir_A05G002550</i>  | 408              | 2,544               | 159                 | 2                   | 10          |
| (AD) <sub>2</sub> | <i>G. barbadense</i> ZJU v1.1 | <i>GB_A05G0251</i>      | 408              | 2,548               | 162                 | 2                   | 9           |
| (AD) <sub>2</sub> | <i>G. barbadense</i> HAU v2.0 | <i>Gbar_A05G042520</i>  | 408              | 2,548               | 162                 | 2                   | 9           |
| (AD) <sub>3</sub> | <i>G. tomentosum</i> HGS_v1.1 | <i>Gotom.A05G027400</i> | 408              | 2,550               | 161                 | 2                   | 10          |
| (AD) <sub>4</sub> | <i>G. mustelinum</i> JGI_v1.1 | <i>Gomus.A05G027200</i> | 408              | 2,422               | 159                 | 2                   | 8           |
| (AD) <sub>5</sub> | <i>G. darwinii</i> HGS_v1.1   | <i>Godar.A05G025900</i> | 408              | 2,549               | 163                 | 2                   | 9           |

**Supplemental Table 30.** The detected segments/QTLs of the trait of FS in the *G. anomalum*-derived CSSL population.

| Environment | Marker interval   | Chr.   | Start (bp) | End (bp)   | LOD  | PVE (%) | ADD   |
|-------------|-------------------|--------|------------|------------|------|---------|-------|
| E1          | JAAS4769–NAU2152  | Chr.11 | 91,616,161 | 99,990,495 | 4.96 | 40.49   | 2.39  |
| E2          | NAU1305–NAU3678   | Chr.07 | 36,412,351 | 80,217,863 | 2.91 | 16.45   | -2.79 |
| E2          | JAAS4769–NAU2152  | Chr.11 | 91,616,161 | 99,990,495 | 3.66 | 21.39   | 1.48  |
| E3          | JAAS4769–NAU2152  | Chr.11 | 91,616,161 | 99,990,495 | 5.91 | 43.97   | 1.96  |
| E4          | JAAS4769–NAU2152  | Chr.11 | 91,616,161 | 99,990,495 | 3.24 | 20.51   | 1.72  |
| Mean        | JAAS2076–JAAS2022 | Chr.04 | 27,206,433 | 79,551,098 | 2.71 | 12.72   | 2.28  |
| Mean        | JAAS4769–NAU2152  | Chr.11 | 91,616,161 | 99,990,495 | 4.38 | 21.77   | 1.78  |

**Supplemental Table 31.** Primers of 19 SSR markers for fine mapping of the *qFS11*.

| Marker name | Forward PCR primer (5'–3')  | Reverse PCR primer (5'–3') |
|-------------|-----------------------------|----------------------------|
| NAU3703     | AACTCCCATCATCAGCAAGT        | TATCAATCGGTTTCAGCAATG      |
| JAAS8011    | TGTGTGTGTGTTATTGGCTGC       | GACCCAGTTGTGTCTAATGTTTTG   |
| JAAS8027    | TGCCCCACCATTCTATTGAT        | GAAGCTGCCTTTCCTCACC        |
| JAAS8033    | CAATATGGATAAAGGTCAATTCCTTTT | GGGAAAATGGAGTTTGAGG        |
| JAAS8034    | TGACAAGAAATTCGGCAGTG        | TGTCCAAAACACATGCTCGT       |
| JAAS8036    | TAGTTTGTTCCTCACGTCG         | CGAATCGAGTTTGTCTCACC       |
| JAAS8037    | TGGTGTAGTTTAACCGTGCAA       | TGATCGACTGATTCGACCTG       |
| JAAS8040    | CACATCATCAACCCATACTATGCT    | TGAACTAAACACCTATTCACCTGC   |
| JAAS8084    | TGGCATAATAATGTCAAACCTTTT    | TAAATCATTGCCTGGGCTTC       |
| JAAS8099    | TTCGGATAGGTCCGAAAGTG        | ATGTTGCTTCACATCCAAGC       |
| JAAS8103    | CCTGCTGGTTTTTATGGCA         | TCATTTGAAAAAGGGAGCCA       |
| JAAS8104    | TTGTGGTGC GGTTTGTATGT       | TGACAATTTTAAGTAAAGAGAGCAAG |
| JAAS8116    | TCTCTTTCTTTCGCCTTGGGA       | GTGCCCAGCAATATCGTTTT       |
| JAAS8125    | TGACTTTGCCTTATTTCCGC        | ACACGTGACTGTGTGCTCGT       |
| JAAS8129    | TGCATGTCACAATCCTTGAC        | TTTCTTGGTTAAGGCCAAGG       |
| JAAS8143    | CTGTACACGACTCTCCGCAA        | GGGATAGCATCAGTTAAGCAGC     |
| JAAS8144    | AAATGGACCAAGTTGCTGCT        | TGCCCAACTTGAGCTTGAAT       |
| JAAS8157    | GTGGGACCTTTGCTTTTGAA        | TTTGGGGTCAAGTTTTGATTC      |
| JAAS8164    | GCCCATGCTCACCTCTAGTC        | TGGAAGGGAAACAAACATGA       |

**Supplemental Table 32.** Summary of RNA-Seq data for CSSL13, CSSL59, and Su8289.

| Sample       | Raw reads  | Clean reads | Clean base<br>(Gb) | Error rate<br>(%) | Q20 (%) | Q30 (%) | GC content<br>(%) |
|--------------|------------|-------------|--------------------|-------------------|---------|---------|-------------------|
| CSSL13_20d_1 | 22,418,501 | 21,680,087  | 6.50               | 0.03              | 97.95   | 93.95   | 44.87             |
| CSSL13_20d_2 | 26,870,022 | 26,001,940  | 7.80               | 0.03              | 98.00   | 94.09   | 44.68             |
| CSSL13_20d_3 | 20,963,564 | 20,227,253  | 6.07               | 0.02              | 98.05   | 94.19   | 44.73             |
| CSSL59_20d_1 | 25,673,966 | 24,568,436  | 7.37               | 0.03              | 97.95   | 93.73   | 44.54             |
| CSSL59_20d_2 | 27,648,078 | 26,755,427  | 8.03               | 0.03              | 97.88   | 93.59   | 44.64             |
| CSSL59_20d_3 | 25,127,994 | 23,966,272  | 7.19               | 0.03              | 98.05   | 93.95   | 44.74             |
| Su8289_20d_1 | 26,678,116 | 25,693,401  | 7.71               | 0.03              | 97.91   | 93.65   | 44.75             |
| Su8289_20d_2 | 22,309,720 | 21,487,496  | 6.45               | 0.03              | 97.92   | 93.69   | 45.02             |
| Su8289_20d_3 | 31,491,960 | 30,147,965  | 9.04               | 0.03              | 98.00   | 93.81   | 46.11             |

**Supplemental Table 33.** The annotation and expression level of 12 genes at 20 DPA fibers in CSSL13, CSSL59, and Su8289. (included as a separate EXCEL file).

**Supplemental Table 34.** The sequence variants of nine genes between between *G. hirsutum* A<sub>1</sub>-subgenome and *G. anomalum*. (included as a separate EXCEL file).

**Supplemental Table 35.** The qRT-PCR primers for nine candidate genes on the *qFS11* interval JAAS8037–JAAS8040.

| Gene ID             | Forward PCR primer (5'–3') | Reverse PCR primer (5'–3') |
|---------------------|----------------------------|----------------------------|
| <i>Goano11G3880</i> | GATAAATTGGAGAAAGGAGGAA     | TAAGAAGCAAACAAAGTAGGAA     |
| <i>Goano11G3883</i> | AGATGATGGCAAGATAGATGA      | TTCCTCTAACTGTTCTGCTTA      |
| <i>Goano11G3885</i> | CTAAGTTTCCTTCTTCTCAAATG    | ACTAGATATACGAGATAAGATGCT   |
| <i>Goano11G3886</i> | AGATACGTTCTCAATCTTCAAT     | TAAACATAACCTGTCTCCTCTA     |
| <i>Goano11G3887</i> | GAAGATGAAAGGGAAATGTGTA     | CAAGCGGATTCAAAGAAATTC      |
| <i>Goano11G3888</i> | AAGATATGAGGTATGGCAAGAA     | GTGTTTGTAGTACGAACTCTATG    |
| <i>Goano11G3897</i> | CGGAATAGGGTTAAGTAAATCTTT   | ATTGGAACAGCATAGCTCTAAA     |
| <i>Goano11G3907</i> | ACCAGATGTCTCAGATAGAA       | CTGTAGTTGGAGTTCGTTAT       |
| <i>Goano11G3918</i> | ATAGCAAATGAATTGATCCATTC    | CCATCTTGATTAACACTAACTCTA   |

**Supplemental Table 36.** The PCR primers of *Goano11G3883* and *GH\_A11G3315* in CSSL59 and Su8289, respectively.

| Gene ID             | Sample | Forward PCR primer (5'–3') | Reverse PCR primer (5'–3') |
|---------------------|--------|----------------------------|----------------------------|
| <i>Goano11G3883</i> | CSSL59 | AGAGGGTTGTATCAAACATCGTG    | CTCTAACTGTTCTGCTTAGCGTTT   |
| <i>GH_A11G3315</i>  | Su8289 | TGATGGCAAACGGTCACAGAGTA    | CTCTAACTGTTCTGCTTAGCGTTT   |



**Supplemental Table 37.** The 130 *G. anomalum*-specific SSR markers for detecting recombinant individuals.

| Chr.   | SSR marker                                                                                                                            |
|--------|---------------------------------------------------------------------------------------------------------------------------------------|
| Chr.01 | JAAS1098, JAAS0006, NAU3690, NAU3615, JAAS1148, NAU2182, NAU5100, NAU3714, NAU2083, JAAS0392, JAAS3221                                |
| Chr.02 | NAU2929, JAAS1489, NAU5421, NAU1190, JAAS0426, NBRI0092, JAAS2050, NAU3820, HAU1219                                                   |
| Chr.03 | NAU2908, NAU1072, JAAS2579, JAAS4015, NAU895, NAU1167, JAAS4003, JAAS0861, JAAS4512, NAU3083                                          |
| Chr.04 | JAAS5943, JAAS5256, NAU2120, JAAS2076, NAU3508, JAAS2022, JAAS2977, DPL494, JAAS2662                                                  |
| Chr.05 | JAAS0803, JAAS4908, JAAS1953, JAAS4815, DC40130, NAU3650, NAU5273, HAU1248, NAU911, JAAS3432, JAAS2949, JAAS0657                      |
| Chr.06 | NAU2714, NAU4969, DPL101, JAAS6138, JAAS2590, NAU905, DPL365, NAU2397, JAAS6227, NBRI3941                                             |
| Chr.07 | JAAS4754, JAAS2966, NAU2686, NAU4956, NBRI0047, NAU1305, JAAS5041, JAAS0945                                                           |
| Chr.08 | JAAS0199, JAAS1049, JAAS3476, JAAS4458, JAAS4933, JAAS4907, JAAS5813, JAAS5861, NAU1037, NAU1262, NAU1322, NAU2169, JAAS6420, NAU2914 |
| Chr.09 | JAAS3113, NAU3100, JAAS2010, JAAS5567, JAAS5248, JAAS4094, JAAS2567, JAAS0163, JAAS1469, JAAS0125, JAAS1923                           |
| Chr.10 | JAAS1256, JAAS3070, NAU4881, NAU1236, JAAS2768, CGR6110, JAAS0321                                                                     |
| Chr.11 | NAU5192, JAAS4259, JAAS2330, JAAS3310, JAAS3820, JAAS3088, NAU1063, JAAS1048, NAU3703, JAAS0852, NAU2152, JAAS4829                    |
| Chr.12 | NAU3109, NAU1274, NAU1119, JAAS2266, NAU3294, JAAS6372, JAAS4943, JAAS3735, JAAS6269                                                  |
| Chr.13 | JAAS2956, JAAS3946, JAAS6264, JAAS5724, NAU2697, NAU3398, NBRI0431, NBRI0978                                                          |

## REFERENCES

- Chen, Z.J., Sreedasyam, A., Ando, A., Song, Q.X., De Santiago, L.M., Hulse-Kemp, A.M., Ding, M.Q., Ye, W.X., Kirkbride, R.C., Jenkins, J., et al. (2020). Genomic diversifications of five *Gossypium* allopolyploid species and their impact on cotton improvement. *Nat. Genet.* **52**:525-533. 10.1038/s41588-020-0614-5.
- Deng, X., Gong, J., Liu, A., Shi, Y., Gong, W., Ge, Q., Li, J., Shang, H., Wu, Y., and Yuan, Y. (2019). QTL mapping for fiber quality and yield-related traits across multiple generations in segregating population of CCRI 70. *J. Cotton Res.* **2**:13. 10.1186/s42397-019-0029-y.
- Diouf, L., Magwanga, R.O., Gong, W., He, S., Pan, Z., Jia, Y.H., Kirungu, J.N., and Du, X. (2018). QTL mapping of fiber quality and yield-related traits in an intra-specific upland cotton using genotype by sequencing (GBS). *Int. J. Mol. Sci.* **19**:441. 10.3390/ijms19020441.
- Guo, Y., Guo, X., Wang, F., Wei, Z., Zhang, S., Wang, L., Yuan, Y., Zeng, W., Zhang, G., Zhang, T., et al. (2014). Molecular tagging and marker-assisted selection of fiber quality traits using chromosome segment introgression lines (CSILs) in cotton. *Euphytica.* **200**:239-250. 10.1007/s10681-014-1150-0.
- Huang, C., Shen, C., Wen, T., Gao, B., Zhu, D., Li, X., Ahmed, M.M., Li, D., and Lin, Z. (2018). SSR-based association mapping of fiber quality in upland cotton using an eight-way MAGIC population. *Mol. Genet. Genomics.* **293**:793-805. 10.1007/s00438-018-1419-4.
- Jamshed, M., Jia, F., Gong, J., Palanga, K.K., Shi, Y., Li, J., Shang, H., Liu, A., Chen, T., Zhang, Z., et al. (2016). Identification of stable quantitative trait loci (QTLs) for fiber quality traits across multiple environments in *Gossypium hirsutum* recombinant inbred line population. *BMC Genomics.* **17**:197. 10.1186/s12864-016-2560-2.
- Jia, X., Wang, H., Pang, C., Ma, Q., Su, J., Wei, H., Song, M., Fan, S., and Yu, S. (2018). QTL delineation for five fiber quality traits based on an intra-specific *Gossypium hirsutum* L. recombinant inbred line population. *Mol. Genet. Genomics.* **293**:831-843. 10.1007/s00438-018-1424-7.
- Lacape, J., Nguyen, T., Courtois, B., Belot, J., Giband, M., Gourlot, J., Gawryziak, G., Roques, S., and Hau, B. (2005). QTL analysis of cotton fiber quality using multiple *Gossypium hirsutum* × *Gossypium barbadense* backcross generations. *Crop Sci.* **45**:123-140. 10.2135/cropsci2005.0123a.
- Li, C., Yu, H., Li, C., Zhao, T., Dong, Y., Deng, X., Hu, J., Zhang, Y., Zhang, F., Daud, M.K., et al. (2018). QTL mapping and heterosis analysis for fiber quality traits across multiple genetic populations and environments in upland cotton. *Front. Plant Sci.* **9**:1364. 10.3389/fpls.2018.01364.
- Liu, R., Gong, J., Xiao, X., Zhang, Z., Li, J., Liu, A., Lu, Q., Shang, H., Shi, Y., Ge, Q., et al. (2018). GWAS analysis and QTL identification of fiber quality traits and yield components in upland cotton using enriched high-density SNP markers. *Front. Plant Sci.* **9**:1067. 10.3389/fpls.2018.01067.
- Ma, L., Zhao, Y., Wang, Y., Shang, L., and Hua, J. (2017). QTLs analysis and validation for fiber quality traits using maternal backcross population in Upland cotton. *Front. Plant Sci.* **8**:2168. 10.3389/fpls.2017.02168.
- Rong, J., Feltus, F.A., Waghmare, V.N., Pierce, G.J., Chee, P.W., Draye, X., Saranga, Y., Wright, R.J., Wilkins, T.A., May, O.L., et al. (2007). Meta-analysis of polyploid cotton QTL shows unequal contributions of subgenomes to a complex network of genes and gene clusters implicated in lint fiber development. *Genetics.* **176**:2577-2588. 10.1534/genetics.107.074518.
- Saranga, Y., Jiang, C.X., Wright, R.J., Yakir, D., and Paterson, A.H. (2004). Genetic dissection of cotton physiological responses to arid conditions and their inter-relationships with productivity. *Plant, Cell Environ.* **27**:263-277. 10.1111/j.1365-3040.2003.01134.x.
- Shang, L., Wang, Y., Wang, X., Liu, F., Abduweli, A., Cai, S., Li, Y., Ma, L., Wang, K., and Hua, J. (2016). Genetic analysis and stable QTL detection on fiber quality traits using two recombinant inbred line populations and their backcross progeny in upland cotton. *G3 (Bethesda).* **6**:2717-2724. 10.1534/g3.116.031302.
- Shapley, Z.W., Jenkins, J.N., Zhu, J., and McCarty, J.C. (1998). Quantitative trait loci associated with agronomic and fiber traits of upland cotton. *J. Cotton Sci.* **2**:153-163.
- Shen, X., Guo, W., Zhu, X., Yuan, Y., Yu, J., Kohel, R., and Zhang, T. (2005). Molecular mapping of QTLs for fiber qualities in three diverse lines in Upland cotton using SSR markers. *Mol. Breeding.* **15**:169-181. 10.1007/s11032-004-4731-0.

- Tang, S., Teng, Z., Zhai, T., Fang, X., Liu, F., Liu, D., Zhang, J., Liu, D., Wang, S., Zhang, K., et al.** (2015). Construction of genetic map and QTL analysis of fiber quality traits for Upland cotton (*Gossypium hirsutum* L.). *Euphytica*. **201**:195-213. 10.1007/s10681-014-1189-y.
- Tan, Z., Zhang, Z., Sun, X., Li, Q., Sun, Y., Yang, P., Wang, W., Liu, X., Chen, C., Liu, D., et al.** (2018). Genetic map construction and fiber quality QTL mapping using the CottonSNP80K array in upland cotton. *Front. Plant Sci.* **9**:225. 10.3389/fpls.2018.00225.
- Wang, B., Guo, W., Zhu, X., Wu, Y., Huang, N., and Zhang, T.** (2007). QTL mapping of yield and yield components for elite hybrid derived-RILs in upland cotton. *J. Genet. Genomics*. **34**:35-45. 10.1016/S1673-8527(07)60005-8.
- Wang, H., Huang, C., Guo, H., Li, X., Zhao, W., Dai, B., Yan, Z., and Lin, Z.** (2015). QTL mapping for fiber and yield traits in upland cotton under multiple environments. *PLoS One*. **10**:e0130742. 10.1371/journal.pone.0130742.
- Wang, H., Jin, X., Zhang, B., Shen, C., and Lin, Z.** (2015). Enrichment of an intraspecific genetic map of upland cotton by developing markers using parental RAD sequencing. *DNA Res.* **22**:147-160. 10.1093/dnares/dsu047.
- Wang, M., Tu, L., Yuan, D., Zhu, D., Shen, C., L, J., Liu, F., Pei, L., Wang, P., Zhao., G., et al.** (2019). Reference genome sequences of two cultivated allotetraploid cottons, *Gossypium hirsutum* and *Gossypium barbadense*. *Nat. Genet.* **51**:224-229. 10.1038/s41588-018-0282-x.
- Yu, J., Zhang, K., Li, S., Yu, Y., Zhai, H., Wu, M., Li, X., Fan, S., Song, M., Yang, D., et al.** (2013). Mapping quantitative trait loci for lint yield and fiber quality across environments in a *Gossypium hirsutum* × *Gossypium barbadense* backcross inbred line population. *Theor. Appl. Genet.* **126**:275-287. 10.1007/s00122-012-1980-x.
- Yu, J.Z., Ulloa, M., Hoffman, S.M., Kohel, R.J., Pepper, A.E., Fang, D.D., Percy, R.G., and Burke, J.J.** (2014). Mapping genomic loci for cotton plant architecture, yield components, and fiber properties in an interspecific (*Gossypium hirsutum* L. × *G. barbadense* L.) RIL population. *Mol. Genet. Genomics*. **289**:1347-1367. 10.1007/s00438-014-0930-5.
- Zhang, K., Zhang, J., Ma, J., Tang, S., Liu, D., Teng, Z., Liu, D., and Zhang, Z.** (2012). Genetic mapping and quantitative trait locus analysis of fiber quality traits using a three-parent composite population in upland cotton (*Gossypium hirsutum* L.). *Mol. Breeding*. **29**:335-348. 10.1007/s11032-011-9549-y.
- Zhang, S., Feng, L., Xing, L., Yang, B., Gao, X., Zhu, X., Zhang, T., Zhou, B. and Jenkins, J.** (2016). New QTLs for lint percentage and boll weight mined in introgression lines from two feral landraces into *Gossypium hirsutum* acc TM-1. *Plant Breed.* **135**:90-101. 10.1111/pbr.12337.
- Zhang, Z., Ge, Q., Liu, A., Li, J., Gong, J., Shang, H., Shi, Y., Chen, T., Wang, Y., Palanga, K.K, et al.** (2017). Construction of a high-density genetic map and its application to QTL identification for fiber strength in upland cotton. *Crop Sci.* **57**:774-788. 10.2135/cropsci2016.06.0544.
